# Supplementary material for: The pressure–temperature phase diagram of tetramorphic pyrazinamide
Source: Royal Society of Chemistry journal article supplement (doi:10.1039/d2ce00484d), 2022-01-01
Supplement: d2ce00484d1.pdf [file d2ce00484d1.pdf]

## Supplementary Materials for the paper:

### The pressure-temperature phase diagram of tetramorphic pyrazinamide

By

Kangli Li, Gabin Gbabode, Marine Vergé-Depré, Benoit Robert, Maria Barrio, Jean-Paul Itié, Josep-lluis Tamarit, and Ivo B. Rietveld

### Data of vapour pressure of four forms of pyrazinamide

**Table S1. The vapor pressure of  $\alpha$ ,  $\beta$ ,  $\gamma$ , and  $\delta$  as a function of temperature**

| $\alpha$ |             | $\gamma$ |            | $\beta$ |             | $\delta$ |             |
|----------|-------------|----------|------------|---------|-------------|----------|-------------|
| $T/K$    | $p/Pa$      | $T/K$    | $p/Pa$     | $T/K$   | $p/Pa$      | $T/K$    | $p/Pa$      |
| 293.15   | 0.00121(6)  | 323.15   | 0.0564(20) | 293.15  | 0.00136(2)  | 301.15   | 0.00375(6)  |
| 295.15   | 0.00166(19) | 333.15   | 0.167(9)   | 295.15  | 0.00187(15) | 303.15   | 0.00504(20) |
| 301.15   | 0.0036(1)   | 343.15   | 0.484(32)  | 297.15  | 0.00243(11) | 305.15   | 0.0067(6)   |
| 313.15   | 0.01804(5)  | 363.16   | 2.88(6)    | 299.15  | 0.00322(13) | 308.15   | 0.0095(4)   |
| 323.15   | 0.0492(9)   | 383.15   | 11.9(1.3)  | 301.15  | 0.00415(20) | 313.15   | 0.0177(5)   |
| 333.15   | 0.162(4)    |          |            |         |             | 323.15   | 0.0560(14)  |
| 343.15   | 0.428(10)   |          |            |         |             | 343.15   | 0.535(49)   |
| 363.15   | 2.59(1)     |          |            |         |             |          |             |
| 373.15   | 5.68(49)    |          |            |         |             |          |             |
| 383.15   | 10.32(65)   |          |            |         |             |          |             |

## Data of phase transition of four forms of pyrazinamide

**Table S2. DSC results measured by using  $\delta$  form at different heating rate**

| measurement                        | Heating rate<br>/K·min <sup>-1</sup> | Transition temperature<br>/K | Transition enthalpy<br>/J·g <sup>-1</sup> |
|------------------------------------|--------------------------------------|------------------------------|-------------------------------------------|
| Transition of $\delta$ to $\gamma$ |                                      |                              |                                           |
| 1                                  | 2                                    | 400.09                       | 14.69                                     |
| 2                                  | 2                                    | 402.24                       | 14.59                                     |
| 3                                  | 4                                    | 401.76                       | 16.68                                     |
| 4                                  | 4                                    | 402.63                       | 12.81                                     |
| 5                                  | 4                                    | 405.84                       | 14.47                                     |
| 6                                  | 5                                    | 402.61                       | 16.33                                     |
| 7                                  | 5                                    | 402.15                       | 15.70                                     |
| 8                                  | 6                                    | 406.36                       | 15.01                                     |
| 9                                  | 6                                    | 405.95                       | 15.71                                     |
| 10                                 | 8                                    | 406.23                       | 16.17                                     |
| 11                                 | 8                                    | 404.89                       | 16.58                                     |
| 12                                 | 10                                   | 405.65                       | 16.58                                     |
| 13                                 | 10                                   | 406.21                       | 16.38                                     |
| 14                                 | 10                                   | 405.98                       | 16.44                                     |
| 15                                 | 10                                   | 407.11                       | 16.51                                     |
| 16                                 | 10                                   | 406.20                       | 15.68                                     |
| 17                                 | 10                                   | 406.97                       | 16.92                                     |
| 18                                 | 10                                   | 404.26                       | 17.57                                     |
| 19                                 | 10                                   | 404.96                       | 17.92                                     |
| 20                                 | 10                                   | 404.99                       | 17.37                                     |
| 21                                 | 10                                   | 406.07                       | 16.88                                     |
| 22                                 | 10                                   | 404.94                       | 17.06                                     |
| 23                                 | 10                                   | 405.37                       | 17.10                                     |
| 24                                 | 10                                   | 406.40                       | 16.93                                     |
| 25                                 | 10                                   | 405.49                       | 18.36                                     |
| 26                                 | 10                                   | 405.03                       | 18.10                                     |
| 27                                 | 10                                   | 405.54                       | 17.70                                     |
| 28                                 | 10                                   | 407.97                       | 17.03                                     |

| measurement                        | Heating rate<br>/K·min <sup>-1</sup> | Transition temperature<br>/K | Transition enthalpy<br>/J·g <sup>-1</sup> |
|------------------------------------|--------------------------------------|------------------------------|-------------------------------------------|
| Transition of $\delta$ to $\alpha$ |                                      |                              |                                           |
| 29                                 | 0.5                                  | 386.33                       | 5.46                                      |
| 30                                 | 1                                    | 386.72                       | 6.02                                      |

**Table S3. DSC results obtained with form  $\beta$  (10 K min<sup>-1</sup>)**

| meas.           | peak 1      |                               | peak 2      |                               | total <sup>b</sup>            | fusion      |                               |
|-----------------|-------------|-------------------------------|-------------|-------------------------------|-------------------------------|-------------|-------------------------------|
|                 | <i>T</i> /K | $\Delta H$ /J·g <sup>-1</sup> | <i>T</i> /K | $\Delta H$ /J·g <sup>-1</sup> | $\Delta H$ /J·g <sup>-1</sup> | <i>T</i> /K | $\Delta H$ /J·g <sup>-1</sup> |
| 1               | 367.75      | 7.81                          | 393.65      | 7.20                          | 15.01                         |             |                               |
| 2               | 372.85      | 7.61                          | 399.95      | 7.17                          | 14.78                         |             |                               |
| 3 <sup>a</sup>  | 373.45      | 5.37                          | 390.65      | 12.37                         | 19.02 <sup>a</sup>            | 461.55      | 233.6                         |
| 4               | 373.95      | 6.54                          | 378.55      | 8.78                          | 15.32                         | 461.65      | 226.6                         |
| 5               | 374.35      | 7.40                          |             | 11.93                         | 19.33                         | 461.55      |                               |
| 6               | 375.65      | 11.57                         |             | 7.72                          | 19.29                         | 461.65      | 232.1                         |
| 7               | 376.45      | 9.79                          |             | 6.80                          | 16.60                         | 461.55      | 232.0                         |
| 8               | 375.45      | 10.66                         |             | 9.26                          | 19.92                         | 461.55      | 235.6                         |
| 9               | 374.75      | 8.16                          | 413.75      | 7.451                         | 15.61                         | 461.55      | 229.1                         |
| 10              | 369.75      | 9.69                          | 393.35      | 11.16                         | 20.85                         | 461.55      | 235.0                         |
| 11              | 373.15      | 7.25                          | 399.35      | 8.66                          | 15.91                         | 461.45      | 237.3                         |
| 12              | 367.95      | 8.92                          | 397.25      | 9.89                          | 18.81                         | 461.55      | 234.3                         |
| 13              | 370.45      |                               |             |                               | 15.41                         | 461.45      | 230.1                         |
| 14 <sup>c</sup> |             |                               | 392.25      |                               | 20.17                         | 462.15      | 238.0                         |
| 15 <sup>c</sup> |             |                               | 397.05      |                               | 15.43                         | 461.65      | 240.0                         |
| 16 <sup>c</sup> |             |                               | 387.95      |                               | 21.62                         | 461.65      | 233.6                         |
| 17 <sup>c</sup> |             |                               | 396.65      |                               | 19.06                         | 462.15      | 236.9                         |

<sup>a</sup> Measurement 3 exhibited a small precursor peak starting at 350.25 K with 1.28 J·g<sup>-1</sup>.

<sup>b</sup> Total enthalpy observed in the solid-solid transitions up to melting.

<sup>c</sup> single crystal(s) sample

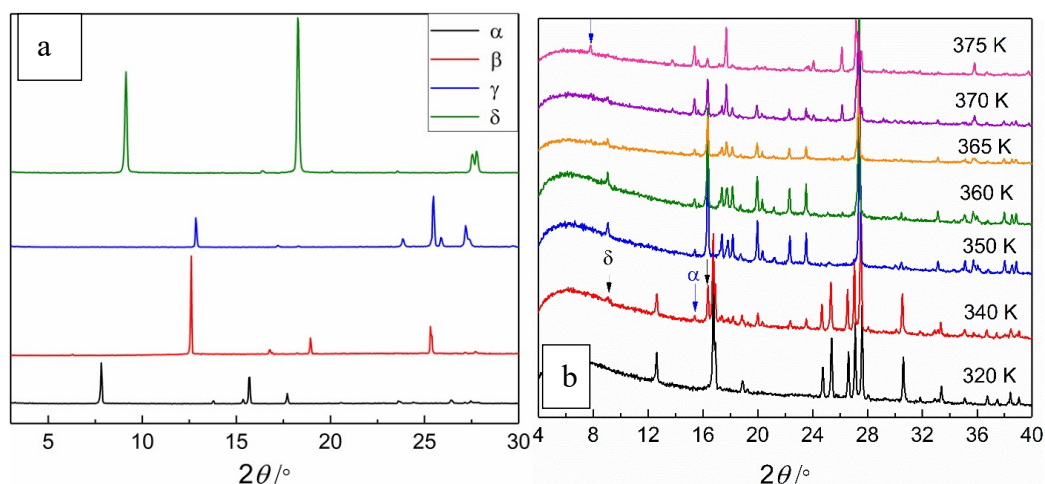

**Figure S1. (a)** Diffraction patterns ( $3\text{--}30^\circ 2\theta$ ) of the four polymorphs used in this article. **(b)** X-ray diffraction starting with form  $\beta$  at  $320\text{ K}$  as a function of the temperature. From  $340\text{ K}$  peaks of forms  $\alpha$  and  $\delta$  can be observed demonstrating the complications to interpret the peaks in the DSC data. At around  $370\text{ K}$ , the  $\delta$  peaks have almost fully converted to  $\alpha$ .

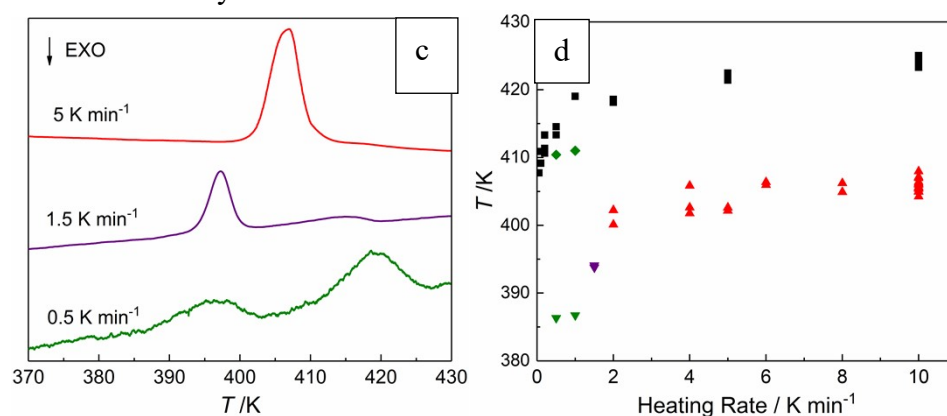

**Figure S1. (c)** DSC curves of the transition from form  $\delta$  through form  $\alpha$  to form  $\gamma$  (green curve) and directly to form  $\gamma$  (red curve) with **(d)** the evolution of the onset of the peaks with the heating rate. The purple curve shows intermediate behaviour. The black squares are  $\alpha$  to  $\gamma$  conversions from a pure  $\alpha$  sample for comparison.

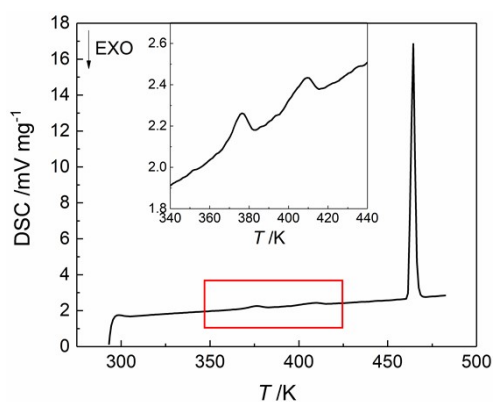

**Figure S1. (e)** A double transformation of polymorph  $\beta$  into another form followed by a transformation into  $\gamma$  demonstrated by its melting point. From the diffraction in Figure S1b, it follows that both  $\alpha$  and  $\delta$  are likely present during the transformations.

**Unit cell parameters of  $\alpha$ ,  $\beta$ ,  $\gamma$  and  $\delta$  form of pyrazinamide as a function of temperature at ordinary pressure**

**Table S4. Unit cell parameters of  $\alpha$  form of pyrazinamide as a function of temperature**

| $T/\text{K}$ | $a/\text{\AA}$ | $b/\text{\AA}$ | $c/\text{\AA}$ | $\beta/^\circ$ | $V/\text{\AA}^3$ |
|--------------|----------------|----------------|----------------|----------------|------------------|
| 100          | 3.6190(2)      | 6.7437(4)      | 22.473(2)      | 92.455(4)      | 547.97(13)       |
| 150          | 3.6404(2)      | 6.7380(4)      | 22.500(2)      | 92.248(4)      | 551.49(5)        |
| 200          | 3.6646(2)      | 6.7304(4)      | 22.540(2)      | 92.086(4)      | 555.59(5)        |
| 250          | 3.6919(2)      | 6.7171(3)      | 22.589(2)      | 91.912(5)      | 559.88(5)        |
| 300          | 3.7198(2)      | 6.7123(4)      | 22.618(2)      | 91.819(4)      | 564.45(6)        |
| 350          | 3.7511(2)      | 6.7078(6)      | 22.666(2)      | 91.745(3)      | 570.05(7)        |
| 377.91       | 3.7700(2)      | 6.6996(5)      | 22.681(2)      | 91.678(4)      | 572.64(6)        |
| 396.43       | 3.7811(2)      | 6.6981(5)      | 22.696(2)      | 91.661(4)      | 574.57(7)        |
| 405.69       | 3.7872(2)      | 6.6962(5)      | 22.709(2)      | 91.648(4)      | 575.69(7)        |
| 387.17       | 3.7757(2)      | 6.6977(6)      | 22.694(2)      | 91.676(4)      | 573.67(7)        |
| 387.17       | 3.7742(3)      | 6.6986(10)     | 22.679(4)      | 91.608(7)      | 573.14(12)       |
| 382.54       | 3.7727(2)      | 6.7018(5)      | 22.677(2)      | 91.632(4)      | 573.13(7)        |
| 396.43       | 3.7798(3)      | 6.6981(6)      | 22.689(2)      | 91.628(5)      | 574.21(8)        |
| 401.06       | 3.7852(3)      | 6.6993(7)      | 22.701(3)      | 91.635(6)      | 575.43(9)        |

**Table S5. Unit cell parameters of  $\beta$  form of pyrazinamide as a function of temperature**

| $T/\text{K}$ | $a/\text{\AA}$ | $b/\text{\AA}$ | $c/\text{\AA}$ | $\beta/^\circ$ | $V/\text{\AA}^3$ |
|--------------|----------------|----------------|----------------|----------------|------------------|
| 125          | 14.351(1)      | 3.6415(2)      | 10.6463(7)     | 101.278(5)     | 545.62(6)        |
| 150          | 14.353(3)      | 3.6531(5)      | 10.6635(21)    | 101.332(15)    | 548.23(17)       |
| 175          | 14.355(1)      | 3.6608(2)      | 10.6668(8)     | 101.434(5)     | 549.44(7)        |
| 200          | 14.357(1)      | 3.6720(2)      | 10.6824(8)     | 101.543(5)     | 551.81(7)        |
| 250          | 14.368(1)      | 3.6932(3)      | 10.7086(8)     | 101.777(6)     | 556.30(7)        |
| 273          | 14.371(1)      | 3.7036(3)      | 10.7190(8)     | 101.867(6)     | 558.34(7)        |
| 295          | 14.376(2)      | 3.7157(3)      | 10.7331(10)    | 102.006(6)     | 560.80(8)        |
| 320          | 14.378(2)      | 3.7257(3)      | 10.7425(9)     | 102.091(6)     | 562.72(7)        |

**Table S6. Unit cell parameters of  $\gamma$  form of pyrazinamide as a function of temperature**

| $T/\text{K}$ | $a/\text{\AA}$ | $b/\text{\AA}$ | $c/\text{\AA}$ | $\beta/^\circ$ | $V/\text{\AA}^3$ |
|--------------|----------------|----------------|----------------|----------------|------------------|
| 100          | 7.1884(4)      | 3.6515(2)      | 10.6922(6)     | 106.580(4)     | 268.99(2)        |
| 125          | 7.1933(5)      | 3.6582(3)      | 10.7066(9)     | 106.654(6)     | 269.93(4)        |
| 150          | 7.1883(4)      | 3.6698(2)      | 10.7062(6)     | 106.626(4)     | 270.63(2)        |
| 175          | 7.1931(5)      | 3.6767(3)      | 10.7174(9)     | 106.699(6)     | 271.50(4)        |
| 200          | 7.1848(5)      | 3.6915(2)      | 10.7226(7)     | 106.656(5)     | 272.46(3)        |
| 225          | 7.1934(6)      | 3.6990(3)      | 10.7363(10)    | 106.740(6)     | 273.58(4)        |
| 250          | 7.1862(4)      | 3.7157(2)      | 10.7439(7)     | 106.716(4)     | 274.76(3)        |
| 275          | 7.1955(5)      | 3.7232(3)      | 10.7582(9)     | 106.792(6)     | 275.93(4)        |
| 297          | 7.1947(5)      | 3.7361(3)      | 10.7672(10)    | 106.804(6)     | 277.07(4)        |
| 300          | 7.1872(5)      | 3.7373(2)      | 10.7626(8)     | 106.778(5)     | 276.79(3)        |
| 325          | 7.1934(6)      | 3.7483(3)      | 10.7784(10)    | 106.870(6)     | 278.12(4)        |
| 350          | 7.1913(6)      | 3.7638(3)      | 10.7873(10)    | 106.834(6)     | 279.47(4)        |
| 373.28       | 7.1901(5)      | 3.7794(2)      | 10.7975(8)     | 106.903(5)     | 280.74(3)        |
| 396.43       | 7.1970(6)      | 3.7918(3)      | 10.8127(9)     | 106.970(5)     | 282.23(4)        |
| 419.58       | 7.2000(5)      | 3.8028(3)      | 10.8291(9)     | 107.014(5)     | 283.53(4)        |
| 419.58       | 7.2061(5)      | 3.8035(3)      | 10.8320(9)     | 107.035(5)     | 283.87(4)        |
| 424.21       | 7.2066(5)      | 3.8062(2)      | 10.8339(9)     | 107.059(5)     | 284.10(4)        |
| 428.84       | 7.2022(5)      | 3.8076(3)      | 10.8340(9)     | 107.051(5)     | 284.05(3)        |
| 433.47       | 7.2097(5)      | 3.8126(2)      | 10.8432(9)     | 107.111(5)     | 284.87(3)        |
| 442.73       | 7.2082(5)      | 3.8149(3)      | 10.8428(10)    | 107.129(5)     | 284.94(4)        |
| 461.25       | 7.2153(6)      | 3.8261(3)      | 10.8529(10)    | 107.201(5)     | 286.22(4)        |

**Table S7. Unit cell parameters of  $\delta$  form of pyrazinamide as a function of temperature**

| $T/\text{K}$ | $a/\text{\AA}$ | $b/\text{\AA}$ | $c/\text{\AA}$ | $\alpha/^\circ$ | $\beta/^\circ$ | $\gamma/^\circ$ | $V/\text{\AA}^3$ |
|--------------|----------------|----------------|----------------|-----------------|----------------|-----------------|------------------|
| 100          | 5.1262(3)      | 5.7101(3)      | 9.8561(8)      | 97.471(5)       | 98.183(4)      | 106.477(4)      | 269.39(3)        |
| 150          | 5.1453(3)      | 5.7135(3)      | 9.8710(7)      | 97.409(5)       | 97.871(4)      | 106.444(4)      | 271.37(3)        |

|        |           |           |           |           |           |            |           |
|--------|-----------|-----------|-----------|-----------|-----------|------------|-----------|
| 200    | 5.1668(3) | 5.7163(3) | 9.8855(8) | 97.348(5) | 97.525(4) | 106.389(4) | 273.50(3) |
| 250    | 5.1910(3) | 5.7198(4) | 9.9078(9) | 97.244(6) | 97.129(5) | 106.314(4) | 276.12(3) |
| 295    | 5.2156(3) | 5.7229(4) | 9.9260(9) | 97.176(6) | 96.753(4) | 106.232(5) | 278.60(3) |
| 300    | 5.2167(3) | 5.7229(3) | 9.9266(8) | 97.192(6) | 96.734(4) | 106.238(4) | 278.67(3) |
| 315    | 5.2254(3) | 5.7231(4) | 9.9339(9) | 97.171(6) | 96.601(4) | 106.207(5) | 279.53(4) |
| 325    | 5.2313(3) | 5.7243(4) | 9.9384(8) | 97.112(6) | 96.526(4) | 106.177(5) | 280.18(3) |
| 335    | 5.2384(3) | 5.7253(4) | 9.9397(8) | 97.105(6) | 96.424(5) | 106.164(4) | 280.76(3) |
| 350    | 5.2471(3) | 5.7268(4) | 9.9526(8) | 97.070(6) | 96.285(5) | 106.136(5) | 281.85(3) |
| 364.02 | 5.2585(3) | 5.7270(4) | 9.9638(9) | 97.046(6) | 96.092(8) | 106.104(4) | 283.01(4) |
| 368.65 | 5.2613(4) | 5.7248(5) | 9.9608(9) | 96.942(5) | 96.112(6) | 106.131(6) | 282.99(4) |

---

**Unit cell parameters of polymorphs  $\alpha$ ,  $\beta$ ,  $\gamma$ , and  $\delta$  of pyrazinamide as a function of pressure for various temperatures**

**Table S8a. Unit cell parameters of form  $\alpha$  at 295 K as a function of pressure**

| $P$ /MPa | $a$ /Å    | $b$ /Å    | $c$ /Å    | $\beta$ /° | $V$ /Å <sup>3</sup> |
|----------|-----------|-----------|-----------|------------|---------------------|
| 17       | 3.7128(3) | 6.7125(5) | 22.610(3) | 91.848(10) | 563.18(8)           |
| 16       | 3.7120(2) | 6.7109(5) | 22.604(3) | 91.851(9)  | 562.78(7)           |
| 19       | 3.7114(2) | 6.7107(4) | 22.601(3) | 91.851(9)  | 562.60(7)           |
| 22       | 3.7103(2) | 6.7108(4) | 22.597(2) | 91.859(9)  | 562.36(7)           |
| 26       | 3.7091(2) | 6.7108(5) | 22.595(3) | 91.865(9)  | 562.10(7)           |
| 31       | 3.7079(3) | 6.7107(5) | 22.593(3) | 91.864(10) | 561.87(8)           |
| 36       | 3.7062(3) | 6.7109(5) | 22.592(3) | 91.886(10) | 561.59(7)           |
| 41       | 3.7050(3) | 6.7109(5) | 22.589(3) | 91.884(11) | 561.35(8)           |
| 47       | 3.7032(3) | 6.7110(3) | 22.587(2) | 91.889(11) | 561.05(7)           |
| 60       | 3.7007(3) | 6.7096(6) | 22.583(3) | 91.865(14) | 560.44(9)           |
| 70       | 3.6979(3) | 6.7093(6) | 22.580(3) | 91.878(15) | 559.92(9)           |
| 80       | 3.6953(4) | 6.7091(6) | 22.576(3) | 91.882(16) | 559.41(10)          |
| 93       | 3.6921(4) | 6.7094(6) | 22.571(3) | 91.894(18) | 558.81(11)          |
| 108      | 3.6889(3) | 6.7100(6) | 22.563(3) | 91.891(16) | 558.18(10)          |
| 124      | 3.6841(3) | 6.7102(6) | 22.556(3) | 91.856(16) | 557.30(9)           |
| 139      | 3.6798(4) | 6.7092(6) | 22.552(3) | 91.870(15) | 556.47(10)          |
| 155      | 3.6759(4) | 6.7091(6) | 22.545(3) | 91.885(14) | 555.70(10)          |
| 174      | 3.6722(4) | 6.7085(7) | 22.541(3) | 91.903(14) | 554.98(11)          |
| 193      | 3.6688(4) | 6.7081(7) | 22.535(3) | 91.924(15) | 554.29(11)          |
| 222      | 3.6616(4) | 6.7073(8) | 22.529(4) | 91.967(16) | 552.99(12)          |
| 255      | 3.6552(4) | 6.7087(7) | 22.517(4) | 92.023(17) | 551.79(11)          |
| 286      | 3.6499(4) | 6.7088(8) | 22.506(4) | 92.040(17) | 550.74(12)          |
| 318      | 3.6440(4) | 6.7074(8) | 22.498(4) | 92.073(16) | 549.54(12)          |
| 341      | 3.6400(5) | 6.7072(8) | 22.490(4) | 92.092(15) | 548.71(13)          |
| 363      | 3.6332(5) | 6.7119(8) | 22.466(4) | 92.050(19) | 547.51(12)          |
| 386      | 3.6296(5) | 6.7112(8) | 22.460(4) | 92.074(19) | 546.74(13)          |
| 407      | 3.6257(5) | 6.7110(8) | 22.455(4) | 92.099(19) | 546.00(13)          |
| 428      | 3.6222(5) | 6.7108(8) | 22.448(4) | 92.143(18) | 545.27(13)          |
| 451      | 3.6182(5) | 6.7108(8) | 22.439(4) | 92.171(20) | 544.46(13)          |
| 471      | 3.6146(5) | 6.7105(8) | 22.437(4) | 92.212(19) | 543.81(13)          |
| 492      | 3.6115(5) | 6.7104(9) | 22.430(4) | 92.252(21) | 543.15(14)          |
| 512      | 3.6081(5) | 6.7104(9) | 22.425(5) | 92.282(21) | 542.52(14)          |
| 533      | 3.6049(5) | 6.7099(9) | 22.422(5) | 92.313(21) | 541.90(15)          |
| 554      | 3.6016(5) | 6.7094(9) | 22.416(5) | 92.339(21) | 541.21(15)          |



|      |            |            |            |            |            |
|------|------------|------------|------------|------------|------------|
| 573  | 3.5986(5)  | 6.7095(9)  | 22.407(5)  | 92.342(20) | 540.55(15) |
| 594  | 3.5955(5)  | 6.7089(9)  | 22.403(4)  | 92.359(21) | 539.94(14) |
| 613  | 3.5923(6)  | 6.7086(9)  | 22.396(5)  | 92.352(23) | 539.27(15) |
| 633  | 3.5894(6)  | 6.7084(9)  | 22.390(5)  | 92.357(23) | 538.69(15) |
| 654  | 3.5867(5)  | 6.7077(10) | 22.385(5)  | 92.359(24) | 538.07(15) |
| 673  | 3.5835(6)  | 6.7065(10) | 22.384(5)  | 92.358(21) | 537.49(15) |
| 691  | 3.5811(6)  | 6.7061(10) | 22.380(5)  | 92.370(26) | 536.99(16) |
| 708  | 3.5788(5)  | 6.7053(10) | 22.375(5)  | 92.375(27) | 536.48(16) |
| 728  | 3.5756(6)  | 6.7047(10) | 22.370(5)  | 92.390(24) | 535.82(16) |
| 747  | 3.5706(7)  | 6.7073(10) | 22.351(5)  | 92.561(30) | 534.76(17) |
| 764  | 3.5681(6)  | 6.7066(10) | 22.348(5)  | 92.564(28) | 534.25(16) |
| 782  | 3.5659(7)  | 6.7061(10) | 22.340(5)  | 92.562(26) | 533.69(17) |
| 799  | 3.5640(6)  | 6.7055(10) | 22.336(5)  | 92.576(25) | 533.25(17) |
| 817  | 3.5618(8)  | 6.7051(11) | 22.326(6)  | 92.581(34) | 532.66(19) |
| 835  | 3.5591(8)  | 6.7042(11) | 22.321(5)  | 92.612(34) | 532.04(19) |
| 852  | 3.5563(8)  | 6.7037(11) | 22.313(6)  | 92.636(33) | 531.39(19) |
| 871  | 3.5532(9)  | 6.7043(12) | 22.304(6)  | 92.687(33) | 530.72(20) |
| 887  | 3.5509(8)  | 6.7041(11) | 22.295(6)  | 92.713(33) | 530.16(19) |
| 903  | 3.5495(9)  | 6.7032(12) | 22.291(6)  | 92.735(33) | 529.77(21) |
| 939  | 3.5464(10) | 6.7010(12) | 22.281(6)  | 92.753(35) | 528.89(21) |
| 979  | 3.5387(11) | 6.6986(12) | 22.267(6)  | 92.821(34) | 527.17(22) |
| 1018 | 3.5359(11) | 6.6960(13) | 22.256(6)  | 92.841(35) | 526.28(22) |
| 1059 | 3.5333(12) | 6.6932(13) | 22.251(6)  | 92.879(42) | 525.53(24) |
| 1135 | 3.5273(14) | 6.6882(14) | 22.232(7)  | 92.950(56) | 523.79(28) |
| 1209 | 3.5227(16) | 6.6837(15) | 22.207(8)  | 92.925(69) | 522.17(31) |
| 1317 | 3.5067(17) | 6.6751(16) | 22.187(8)  | 92.751(72) | 518.73(33) |
| 1420 | 3.4981(18) | 6.6698(16) | 22.161(8)  | 92.620(80) | 516.50(33) |
| 1514 | 3.4921(20) | 6.6656(17) | 22.136(8)  | 92.663(88) | 514.69(37) |
| 1603 | 3.4870(21) | 6.6614(17) | 22.109(9)  | 92.648(94) | 513.02(38) |
| 1688 | 3.4813(25) | 6.6551(18) | 22.093(9)  | 92.59(11)  | 511.32(44) |
| 1776 | 3.4777(26) | 6.6507(18) | 22.062(9)  | 92.51(12)  | 509.78(45) |
| 1864 | 3.4697(26) | 6.6419(19) | 22.051(9)  | 92.52(12)  | 507.67(45) |
| 1950 | 3.4662(27) | 6.6362(19) | 22.038(10) | 92.53(14)  | 506.44(47) |
| 2065 | 3.4609(26) | 6.6220(20) | 22.037(9)  | 92.59(15)  | 504.52(46) |

**Table S8b. Unit cell parameters of form  $\alpha$  at 367 K as a function of pressure**

| $P$ /MPa | $a$ /Å      | $b$ /Å    | $c$ /Å    | $\beta$ /° | $V$ /Å <sup>3</sup> |
|----------|-------------|-----------|-----------|------------|---------------------|
| 1(1)     | 3.73840(16) | 6.7318(4) | 22.707(2) | 91.810(7)  | 571.18(7)           |
| 2(1)     | 3.73886(16) | 6.7314(4) | 22.707(2) | 91.807(7)  | 571.21(7)           |
| 18(1)    | 3.73464(15) | 6.7305(4) | 22.702(2) | 91.814(7)  | 570.36(7)           |
| 33(1)    | 3.73099(16) | 6.7294(4) | 22.696(2) | 91.809(7)  | 569.55(7)           |
| 53(1)    | 3.72609(17) | 6.7281(4) | 22.689(2) | 91.814(8)  | 568.52(7)           |
| 72(1)    | 3.7209(2)   | 6.7275(5) | 22.678(3) | 91.823(9)  | 567.41(8)           |
| 97(2)    | 3.7144(3)   | 6.7262(5) | 22.670(3) | 91.817(11) | 566.12(8)           |

|                    |            |            |           |            |            |
|--------------------|------------|------------|-----------|------------|------------|
| 120(1)             | 3.7081(3)  | 6.7260(5)  | 22.658(3) | 91.798(14) | 564.83(8)  |
| 146(2)             | 3.7021(3)  | 6.7257(5)  | 22.646(3) | 91.790(16) | 563.61(9)  |
| 178(1)             | 3.6917(3)  | 6.7264(5)  | 22.627(4) | 91.652(15) | 561.65(9)  |
| 203(2)             | 3.6876(5)  | 6.7258(7)  | 22.617(4) | 91.692(19) | 560.71(12) |
| 233(2)             | 3.6824(5)  | 6.7250(8)  | 22.607(4) | 91.739(19) | 559.58(13) |
| 260(2)             | 3.6780(5)  | 6.7237(8)  | 22.601(4) | 91.759(18) | 558.66(13) |
| 296(2)             | 3.6685(4)  | 6.7229(8)  | 22.594(4) | 91.797(19) | 556.95(14) |
| 323(2)             | 3.6636(5)  | 6.7227(8)  | 22.583(5) | 91.86(2)   | 555.90(15) |
| 347(2)             | 3.6590(5)  | 6.7224(10) | 22.573(5) | 91.88(2)   | 554.94(16) |
| 365(2)             | 3.6559(5)  | 6.7218(10) | 22.570(5) | 91.87(2)   | 554.33(17) |
| 392(3)             | 3.6514(6)  | 6.7226(12) | 22.560(6) | 91.92(3)   | 553.47(18) |
| 417(3)             | 3.6452(5)  | 6.7255(9)  | 22.539(5) | 91.84(3)   | 552.26(15) |
| 439(2)             | 3.6406(6)  | 6.7256(10) | 22.525(5) | 91.74(3)   | 551.27(17) |
| 457(2)             | 3.6365(6)  | 6.7252(9)  | 22.518(5) | 91.68(3)   | 550.48(16) |
| 479(3)             | 3.6333(6)  | 6.7247(11) | 22.514(6) | 91.77(3)   | 549.83(18) |
| 496(3)             | 3.6302(7)  | 6.7240(12) | 22.512(6) | 91.77(3)   | 549.25(20) |
| 511(2)             | 3.6286(6)  | 6.7234(11) | 22.508(6) | 91.80(3)   | 548.82(18) |
| 525(3)             | 3.6261(6)  | 6.7230(12) | 22.503(6) | 91.81(3)   | 548.31(20) |
| 541(3)             | 3.6246(6)  | 6.7247(12) | 22.490(6) | 92.03(3)   | 547.84(19) |
| 557(3)             | 3.6225(6)  | 6.7244(12) | 22.487(6) | 92.08(3)   | 547.40(19) |
| 574(3)             | 3.6196(5)  | 6.7241(12) | 22.482(6) | 92.093(19) | 546.82(18) |
| 588(3)             | 3.6164(5)  | 6.7217(13) | 22.479(6) | 92.06(3)   | 546.08(19) |
| 601(3)             | 3.6144(6)  | 6.7214(13) | 22.476(6) | 92.07(3)   | 545.67(20) |
| 616(3)             | 3.6123(6)  | 6.7212(13) | 22.475(7) | 92.10(3)   | 545.3(2)   |
| 631(2)             | 3.6105(6)  | 6.7222(13) | 22.464(7) | 92.18(3)   | 544.8(2)   |
| 646(3)             | 3.6082(6)  | 6.7218(13) | 22.458(6) | 92.20(3)   | 544.30(20) |
| 665(3)             | 3.6058(6)  | 6.7219(13) | 22.452(6) | 92.23(3)   | 543.77(20) |
| 697(3)             | 3.6000(6)  | 6.7196(12) | 22.450(6) | 92.22(3)   | 542.66(20) |
| 713(3)             | 3.5982(6)  | 6.7192(13) | 22.446(7) | 92.25(3)   | 542.3(2)   |
| 726(3)             | 3.5947(6)  | 6.7199(13) | 22.440(7) | 92.26(3)   | 541.6(2)   |
| 743(3)             | 3.5936(7)  | 6.7187(14) | 22.438(6) | 92.26(3)   | 541.3(2)   |
| 757(3)             | 3.5909(5)  | 6.7180(14) | 22.433(7) | 92.25(3)   | 540.8(2)   |
| 769(3)             | 3.5889(7)  | 6.7194(14) | 22.422(7) | 92.28(4)   | 540.3(2)   |
| 783(3)             | 3.5867(7)  | 6.7179(13) | 22.419(7) | 92.28(3)   | 539.8(2)   |
| 804(3)             | 3.5824(6)  | 6.7182(11) | 22.408(6) | 92.26(4)   | 538.88(18) |
| 827(3)             | 3.5798(8)  | 6.7178(15) | 22.398(7) | 92.23(4)   | 538.2(3)   |
| 846(3)             | 3.5770(8)  | 6.7169(15) | 22.388(7) | 92.27(4)   | 537.5(3)   |
| 871(3)             | 3.5699(11) | 6.7186(15) | 22.364(8) | 92.36(5)   | 535.9(3)   |
| 924(3)             | 3.5622(13) | 6.7154(13) | 22.338(7) | 92.39(6)   | 533.9(3)   |
| 982(3)             | 3.5579(13) | 6.7131(16) | 22.315(8) | 92.58(6)   | 532.6(3)   |
| 1039(3)            | 3.5537(13) | 6.7089(17) | 22.298(9) | 92.70(5)   | 531.0(3)   |
| 94(2) <sup>a</sup> | 3.7124(3)  | 6.7262(7)  | 22.656(3) | 91.818(13) | 565.46(10) |

<sup>a</sup> Obtained on releasing the pressure.

**Table S8c. Unit cell parameters of form  $\alpha$  at 427 K as a function of pressure**

| $P$ /MPa | $a$ /Å      | $b$ /Å     | $c$ /Å      | $\beta$ /° | $V$ /Å <sup>3</sup> |
|----------|-------------|------------|-------------|------------|---------------------|
| 19(2)    | 3.78835(19) | 6.7206(5)  | 22.7705(20) | 91.708(8)  | 579.48(7)           |
| 4(1)     | 3.78694(19) | 6.7220(5)  | 22.768(3)   | 91.715(7)  | 579.32(8)           |
| 2(1)     | 3.78767(18) | 6.7221(5)  | 22.769(3)   | 91.718(7)  | 579.46(8)           |
| 2(1)     | 3.78771(19) | 6.7217(5)  | 22.771(3)   | 91.716(7)  | 579.48(9)           |
| 2(1)     | 3.78784(18) | 6.7219(5)  | 22.769(3)   | 91.719(7)  | 579.47(8)           |
| 2(1)     | 3.78789(19) | 6.7219(5)  | 22.769(3)   | 91.719(7)  | 579.49(8)           |
| 3(1)     | 3.78784(18) | 6.7219(5)  | 22.770(3)   | 91.720(7)  | 579.49(8)           |
| 2(1)     | 3.78796(18) | 6.7219(5)  | 22.771(3)   | 91.720(7)  | 579.53(8)           |
| 5(1)     | 3.78723(18) | 6.7228(5)  | 22.772(3)   | 91.725(7)  | 579.54(8)           |
| 5(1)     | 3.78701(15) | 6.7228(5)  | 22.774(3)   | 91.728(7)  | 579.56(8)           |
| 11(1)    | 3.7854(18)  | 6.7232(5)  | 22.771(3)   | 91.736(7)  | 579.25(8)           |
| 12(1)    | 3.78487(18) | 6.7228(5)  | 22.772(3)   | 91.738(7)  | 579.16(8)           |
| 19(1)    | 3.78202(14) | 6.7221(5)  | 22.770(3)   | 91.733(7)  | 578.62(8)           |
| 21(1)    | 3.78113(18) | 6.7218(5)  | 22.768(3)   | 91.734(7)  | 578.41(9)           |
| 34(1)    | 3.77666(16) | 6.7207(4)  | 22.763(3)   | 91.718(8)  | 577.50(7)           |
| 46(1)    | 3.7718(2)   | 6.7198(5)  | 22.754(3)   | 91.702(8)  | 576.46(9)           |
| 61(1)    | 3.7671(2)   | 6.7190(5)  | 22.746(3)   | 91.678(8)  | 575.48(9)           |
| 76(1)    | 3.7622(3)   | 6.7186(6)  | 22.737(3)   | 91.656(9)  | 574.46(9)           |
| 102(1)   | 3.7526(3)   | 6.7174(6)  | 22.726(3)   | 91.633(10) | 572.63(9)           |
| 136(1)   | 3.7419(3)   | 6.7178(6)  | 22.707(3)   | 91.643(11) | 570.55(10)          |
| 179(1)   | 3.7302(3)   | 6.7175(6)  | 22.686(4)   | 91.650(14) | 568.21(11)          |
| 227(1)   | 3.7188(5)   | 6.7154(7)  | 22.669(4)   | 91.656(19) | 565.87(13)          |
| 286(1)   | 3.7061(6)   | 6.7121(8)  | 22.652(4)   | 91.66(3)   | 563.26(15)          |
| 340(1)   | 3.6953(8)   | 6.7100(8)  | 22.632(4)   | 91.64(2)   | 560.94(17)          |
| 398(1)   | 3.6820(8)   | 6.7071(10) | 22.614(5)   | 91.61(3)   | 558.26(19)          |
| 460(1)   | 3.6717(9)   | 6.7044(11) | 22.590(5)   | 91.63(3)   | 555.9(2)            |
| 523(2)   | 3.6582(8)   | 6.7032(12) | 22.571(6)   | 91.66(3)   | 553.2(2)            |
| 590(2)   | 3.6472(6)   | 6.7040(10) | 22.545(5)   | 91.69(4)   | 551.0(2)            |
| 656(2)   | 3.6364(9)   | 6.7039(15) | 22.523(8)   | 91.67(4)   | 548.8(3)            |
| 740(2)   | 3.6215(6)   | 6.7059(15) | 22.491(8)   | 91.67(4)   | 546.0(3)            |
| 838(2)   | 3.6062(10)  | 6.7026(16) | 22.472(8)   | 91.76(5)   | 542.9(3)            |
| 953(2)   | 3.5875(12)  | 6.6989(18) | 22.439(9)   | 91.88(6)   | 539.0(3)            |
| 1060(2)  | 3.5636(18)  | 6.7002(18) | 22.374(8)   | 92.13(6)   | 533.9(4)            |
| 1202(2)  | 3.5349(16)  | 6.6936(19) | 22.338(10)  | 92.65(8)   | 528.0(4)            |
| 1371(2)  | 3.5214(20)  | 6.681(3)   | 22.292(12)  | 92.87(10)  | 523.8(5)            |

**Table S8d. Unit cell parameters of form  $\alpha$  at 460 K as a function of pressure**

| $P$ /MPa | $a$ /Å    | $b$ /Å    | $c$ /Å    | $\beta$ /° | $V$ /Å <sup>3</sup> |
|----------|-----------|-----------|-----------|------------|---------------------|
| 2(1)     | 3.8169(3) | 6.7274(6) | 22.834(3) | 91.742(10) | 586.06(11)          |
| 1(1)     | 3.8172(3) | 6.7275(6) | 22.834(3) | 91.741(9)  | 586.12(10)          |
| 1(1)     | 3.8173(3) | 6.7274(6) | 22.834(3) | 91.741(10) | 586.12(11)          |

|                   |            |            |            |            |            |
|-------------------|------------|------------|------------|------------|------------|
| 1(1)              | 3.8174(3)  | 6.7274(6)  | 22.835(3)  | 91.737(9)  | 586.14(10) |
| 2(1)              | 3.8173(3)  | 6.7273(6)  | 22.834(3)  | 91.732(9)  | 586.10(10) |
| 3(1)              | 3.8172(3)  | 6.7273(6)  | 22.833(3)  | 91.734(9)  | 586.08(10) |
| 5(1)              | 3.8172(3)  | 6.7275(6)  | 22.834(3)  | 91.746(9)  | 586.12(10) |
| 9(1)              | 3.8149(3)  | 6.7284(6)  | 22.827(3)  | 91.736(10) | 585.67(10) |
| 18(1)             | 3.8084(3)  | 6.7265(7)  | 22.826(4)  | 91.711(11) | 584.49(12) |
| 35(1)             | 3.7991(3)  | 6.7271(7)  | 22.808(4)  | 91.772(12) | 582.63(12) |
| 54(1)             | 3.7936(4)  | 6.7254(8)  | 22.802(4)  | 91.776(12) | 581.47(13) |
| 57(1)             | 3.7948(3)  | 6.7239(7)  | 22.798(4)  | 91.760(11) | 581.45(12) |
| 117(1)            | 3.7804(4)  | 6.7202(8)  | 22.770(4)  | 91.748(13) | 578.20(13) |
| 188(1)            | 3.7625(4)  | 6.7152(8)  | 22.744(4)  | 91.680(13) | 574.40(12) |
| 269(1)            | 3.7424(4)  | 6.7099(7)  | 22.714(4)  | 91.656(12) | 570.14(12) |
| 330(1)            | 3.7274(3)  | 6.7074(7)  | 22.688(4)  | 91.659(15) | 566.99(12) |
| 2(1)              | 3.8148(3)  | 6.7288(7)  | 22.832(4)  | 91.748(10) | 585.81(11) |
| 2(1)              | 3.8156(3)  | 6.7287(7)  | 22.833(4)  | 91.744(10) | 585.95(11) |
| 6(1)              | 3.8142(3)  | 6.7277(6)  | 22.830(3)  | 91.725(9)  | 585.57(10) |
| 11(1)             | 3.8071(3)  | 6.7242(7)  | 22.827(3)  | 91.708(10) | 584.09(11) |
| 200(1)            | 3.7594(3)  | 6.7117(6)  | 22.740(4)  | 91.598(12) | 573.56(11) |
| 262(1)            | 3.7452(3)  | 6.7087(7)  | 22.713(4)  | 91.615(12) | 570.44(12) |
| 318(1)            | 3.7340(4)  | 6.7070(7)  | 22.684(4)  | 91.616(14) | 567.86(13) |
| 359(1)            | 3.7226(5)  | 6.7055(8)  | 22.666(4)  | 91.638(16) | 565.55(14) |
| 400(1)            | 3.7136(5)  | 6.7038(8)  | 22.650(4)  | 91.639(16) | 563.64(14) |
| 445(1)            | 3.7034(7)  | 6.7011(8)  | 22.632(5)  | 91.65(3)   | 561.44(16) |
| 486(1)            | 3.6940(9)  | 6.6984(9)  | 22.621(5)  | 91.66(3)   | 559.49(19) |
| 529(2)            | 3.6854(10) | 6.6939(11) | 22.611(6)  | 91.66(3)   | 557.6(3)   |
| 578(2)            | 3.6760(9)  | 6.6959(13) | 22.575(7)  | 91.63(3)   | 555.4(3)   |
| 628(2)            | 3.6684(10) | 6.6927(14) | 22.559(7)  | 91.66(4)   | 553.6(3)   |
| 674(2)            | 3.6582(12) | 6.6880(15) | 22.549(8)  | 91.66(4)   | 551.5(3)   |
| 769(2)            | 3.6386(9)  | 6.6917(16) | 22.509(8)  | 91.70(5)   | 547.8(3)   |
| 857(2)            | 3.6263(14) | 6.6901(16) | 22.484(9)  | 91.66(5)   | 545.2(3)   |
| 928(2)            | 3.6126(16) | 6.6912(17) | 22.449(9)  | 91.70(7)   | 542.4(4)   |
| 1012(2)           | 3.6045(18) | 6.6897(19) | 22.412(9)  | 91.75(9)   | 540.2(4)   |
| 1091(2)           | 3.5970(8)  | 6.6870(20) | 22.391(9)  | 91.74(9)   | 538.3(3)   |
| 1249(2)           | 3.5829(17) | 6.6804(19) | 22.340(10) | 92.00(9)   | 534.4(4)   |
| 3(1) <sup>a</sup> | 3.8146(4)  | 6.7276(7)  | 22.830(4)  | 91.777(12) | 585.62(12) |

<sup>a</sup> Obtained on releasing the pressure.

**Table S9a. Unit cell parameters of form  $\beta$  at 295 K as a function of pressure<sup>a</sup>**

| $P$ /MPa | $a$ /Å    | $b$ /Å    | $c$ /Å      | $\beta$ /°  | $V$ /Å <sup>3</sup> |
|----------|-----------|-----------|-------------|-------------|---------------------|
| 24(8)    | 14.360(3) | 3.7102(3) | 10.7225(9)  | 101.927(10) | 558.94(13)          |
| 84(9)    | 14.356(4) | 3.7086(4) | 10.7229(11) | 101.949(12) | 558.53(16)          |
| 85(11)   | 14.375(5) | 3.7055(5) | 10.720(2)   | 101.94(3)   | 558.7(3)            |
| 144(8)   | 14.373(5) | 3.6995(4) | 10.722(3)   | 101.91(3)   | 557.8(3)            |
| 147(9)   | 14.370(5) | 3.6937(6) | 10.724(2)   | 101.96(3)   | 556.9(3)            |
| 206(9)   | 14.358(5) | 3.6858(8) | 10.719(3)   | 101.94(3)   | 555.0(3)            |

|          |            |            |            |            |            |
|----------|------------|------------|------------|------------|------------|
| 208(9)   | 14.347(6)  | 3.6770(13) | 10.703(3)  | 101.73(4)  | 552.8(4)   |
| 271(10)  | 14.326(6)  | 3.6662(13) | 10.708(5)  | 101.70(6)  | 550.7(4)   |
| 334(12)  | 14.329(9)  | 3.6478(13) | 10.676(13) | 101.36(10) | 547.1(8)   |
| 403(22)  | 14.318(9)  | 3.6313(12) | 10.661(7)  | 101.41(4)  | 543.3(5)   |
| 530(16)  | 14.298(9)  | 3.6183(9)  | 10.648(11) | 101.30(9)  | 540.2(7)   |
| 598(20)  | 14.282(9)  | 3.6047(11) | 10.637(15) | 101.22(10) | 537.2(9)   |
| 700(21)  | 14.280(8)  | 3.5904(13) | 10.617(16) | 101.12(9)  | 534.1(9)   |
| 802(27)  | 14.274(7)  | 3.5786(15) | 10.589(9)  | 101.06(9)  | 530.9(6)   |
| 877(28)  | 14.262(7)  | 3.5684(14) | 10.570(10) | 100.95(10) | 528.1(6)   |
| 943(38)  | 14.240(11) | 3.560(2)   | 10.564(17) | 100.8(2)   | 526.0(1.0) |
| 1019(60) | 14.239(9)  | 3.5544(12) | 10.55(2)   | 100.84(16) | 524.6(1.2) |
| 1233(37) | 14.24(2)   | 3.531(3)   | 10.54(4)   | 100.7(4)   | 521(2)     |
| 1622(27) | 14.223(13) | 3.521(4)   | 10.50(3)   | 100.9(3)   | 516.6(1.4) |

<sup>a</sup> The interpretation of the unit-cell parameters of the  $\beta$  form have been more complicated due to the presence of the  $\gamma$  form.

**Table S9b. Unit cell parameters of form  $\beta$  at 348 K as a function of pressure<sup>a</sup>**

| $P$ /MPa             | $a$ /Å     | $b$ /Å     | $c$ /Å     | $\beta$ /° | $V$ /Å <sup>3</sup> |
|----------------------|------------|------------|------------|------------|---------------------|
| 206(23)              | 14.454(6)  | 3.677(3)   | 10.710(5)  | 101.71(7)  | 557.4(6)            |
| 236(18)              | 14.443(6)  | 3.671(3)   | 10.708(5)  | 101.59(7)  | 556.2(6)            |
| 329(15)              | 14.420(5)  | 3.661(4)   | 10.689(5)  | 101.45(7)  | 553.1(6)            |
| 430(17)              | 14.404(7)  | 3.654(4)   | 10.672(7)  | 101.45(11) | 550.5(8)            |
| 524(18)              | 14.394(7)  | 3.6383(19) | 10.658(8)  | 101.39(9)  | 547.2(6)            |
| 590(17)              | 14.392(9)  | 3.632(6)   | 10.651(10) | 101.38(14) | 545.8(1.1)          |
| 657(19)              | 14.379(7)  | 3.620(4)   | 10.642(8)  | 101.36(9)  | 543.0(7)            |
| 793(23)              | 14.336(6)  | 3.5900(14) | 10.627(8)  | 101.29(8)  | 536.4(5)            |
| 869(17)              | 14.318(6)  | 3.5816(16) | 10.618(6)  | 101.32(7)  | 533.9(5)            |
| 1003(20)             | 14.278(7)  | 3.572(2)   | 10.601(10) | 101.21(9)  | 530.4(7)            |
| 1079(18)             | 14.290(11) | 3.560(4)   | 10.585(12) | 101.0(2)   | 528.4(1.0)          |
| 1219(19)             | 14.288(7)  | 3.5532(12) | 10.576(12) | 101.08(10) | 526.9(7)            |
| 332(12) <sup>b</sup> | 14.412(6)  | 3.660(3)   | 10.676(6)  | 101.39(8)  | 552.1(6)            |

<sup>a</sup> The interpretation of the unit-cell parameters of the  $\beta$  form have been more complicated due to the presence of form  $\gamma$ .

<sup>b</sup> Obtained on releasing the pressure.

**Table S9c. Unit cell parameters of form  $\beta$  at 396 K as a function of pressure<sup>a</sup>**

| $P$ /MPa | $a$ /Å    | $b$ /Å     | $c$ /Å    | $\beta$ /° | $V$ /Å <sup>3</sup> |
|----------|-----------|------------|-----------|------------|---------------------|
| 173(3)   | 14.504(7) | 3.6882(19) | 10.758(5) | 101.71(7)  | 563.5(5)            |
| 295(4)   | 14.479(6) | 3.6778(13) | 10.735(5) | 101.66(7)  | 559.8(5)            |
| 424(5)   | 14.458(7) | 3.660(3)   | 10.716(6) | 101.68(9)  | 555.4(6)            |
| 554(4)   | 14.456(7) | 3.647(4)   | 10.697(7) | 101.59(9)  | 552.4(7)            |
| 620(4)   | 14.452(4) | 3.620(2)   | 10.682(5) | 101.55(6)  | 547.5(5)            |
| 687(6)   | 14.428(4) | 3.609(2)   | 10.674(6) | 101.57(7)  | 544.4(4)            |

|         |            |          |            |            |            |
|---------|------------|----------|------------|------------|------------|
| 754(5)  | 14.405(5)  | 3.601(2) | 10.665(6)  | 101.56(7)  | 542.0(4)   |
| 826(5)  | 14.357(6)  | 3.590(3) | 10.643(8)  | 101.38(8)  | 537.8(7)   |
| 962(5)  | 14.324(6)  | 3.581(5) | 10.630(7)  | 101.40(7)  | 534.5(8)   |
| 1036(5) | 14.298(8)  | 3.574(7) | 10.621(11) | 101.48(11) | 531.8(1.2) |
| 1250(6) | 14.273(14) | 3.565(3) | 10.601(16) | 101.39(18) | 528.8(1.1) |
| 1402(5) | 14.298(12) | 3.563(4) | 10.597(8)  | 101.66(8)  | 528.6(8)   |

<sup>a</sup> The interpretation of the unit-cell parameters of the  $\beta$  form have been more complicated due to the presence of the  $\gamma$  form.

**Table S10a. Unit cell parameters of form  $\gamma$  at 295 K as a function of pressure**

| $P$ /MPa | $a$ /Å     | $b$ /Å    | $c$ /Å      | $\beta$ /°  | $V$ /Å <sup>3</sup> |
|----------|------------|-----------|-------------|-------------|---------------------|
| 209(6)   | 7.1858(8)  | 3.6998(3) | 10.7220(6)  | 106.649(8)  | 273.10(4)           |
| 223(7)   | 7.1847(8)  | 3.6986(3) | 10.7203(6)  | 106.638(9)  | 272.95(4)           |
| 403(8)   | 7.1738(13) | 3.6689(4) | 10.6949(8)  | 106.650(12) | 269.68(6)           |
| 516(9)   | 7.1778(13) | 3.6461(6) | 10.6780(8)  | 106.656(13) | 267.73(7)           |
| 604(9)   | 7.1797(12) | 3.6294(6) | 10.6662(9)  | 106.623(13) | 266.33(7)           |
| 684(8)   | 7.1747(10) | 3.6168(5) | 10.6580(8)  | 106.678(12) | 264.94(6)           |
| 812(8)   | 7.1615(9)  | 3.5978(5) | 10.6439(8)  | 106.719(8)  | 262.66(5)           |
| 924(8)   | 7.1544(9)  | 3.5839(4) | 10.6306(8)  | 106.717(12) | 261.06(5)           |
| 1027(9)  | 7.1497(10) | 3.5710(4) | 10.6171(9)  | 106.715(12) | 259.62(5)           |
| 1124(9)  | 7.1433(11) | 3.5600(4) | 10.6049(9)  | 106.698(13) | 258.32(6)           |
| 1271(9)  | 7.1414(13) | 3.5437(5) | 10.5850(10) | 106.648(15) | 256.64(7)           |
| 1434(10) | 7.1424(13) | 3.5263(5) | 10.5640(10) | 106.557(15) | 255.03(7)           |
| 1620(10) | 7.1509(17) | 3.5048(7) | 10.5440(11) | 106.557(18) | 253.30(9)           |
| 1849(10) | 7.1529(17) | 3.4796(7) | 10.5213(11) | 106.548(18) | 251.03(9)           |

**Table S10b. Unit cell parameters of form  $\gamma$  at 324 K as a function of pressure**

| $P$ /MPa | $a$ /Å     | $b$ /Å    | $c$ /Å      | $\beta$ /°  | $V$ /Å <sup>3</sup> |
|----------|------------|-----------|-------------|-------------|---------------------|
| 307(8)   | 7.1836(10) | 3.6796(5) | 10.7187(7)  | 106.722(10) | 271.35(6)           |
| 438(8)   | 7.1796(10) | 3.6628(4) | 10.7033(6)  | 106.720(9)  | 269.57(5)           |
| 652(8)   | 7.1803(8)  | 3.6308(3) | 10.6775(6)  | 106.703(9)  | 266.62(4)           |
| 788(9)   | 7.1727(8)  | 3.6134(3) | 10.6627(6)  | 106.718(9)  | 264.68(4)           |
| 889(17)  | 7.1679(12) | 3.6013(4) | 10.6515(18) | 106.718(9)  | 263.33(7)           |
| 972(9)   | 7.1635(8)  | 3.5913(3) | 10.6417(7)  | 106.722(9)  | 262.19(4)           |
| 1048(10) | 7.1584(9)  | 3.5816(3) | 10.6321(7)  | 106.734(10) | 261.05(4)           |
| 1170(10) | 7.1506(10) | 3.5676(3) | 10.6188(8)  | 106.735(11) | 259.42(5)           |
| 1279(11) | 7.1444(12) | 3.5550(4) | 10.6042(8)  | 106.724(12) | 257.94(6)           |
| 1387(12) | 7.1400(12) | 3.5440(4) | 10.5912(9)  | 106.695(13) | 256.71(6)           |
| 1491(13) | 7.1414(13) | 3.5326(4) | 10.5780(9)  | 106.671(13) | 255.64(6)           |
| 1595(14) | 7.1461(15) | 3.5217(5) | 10.5652(10) | 106.615(16) | 254.79(8)           |
| 1751(14) | 7.1528(18) | 3.5042(7) | 10.5477(11) | 106.608(17) | 253.35(9)           |
| 1917(14) | 7.1585(9)  | 3.4844(6) | 10.5323(11) | 106.614(16) | 251.74(6)           |

**Table S10c. Unit cell parameters of form  $\gamma$  at 381 K as a function of pressure**

| $P$ /MPa | $a$ /Å     | $b$ /Å    | $c$ /Å      | $\beta$ /°  | $V$ /Å <sup>3</sup> |
|----------|------------|-----------|-------------|-------------|---------------------|
| 190(8)   | 7.1939(9)  | 3.7451(3) | 10.7751(8)  | 106.775(10) | 277.94(5)           |
| 310(7)   | 7.1940(9)  | 3.7229(3) | 10.7543(6)  | 106.751(9)  | 275.80(5)           |
| 609(7)   | 7.1785(12) | 3.6738(5) | 10.7091(8)  | 106.728(12) | 270.48(6)           |
| 762(7)   | 7.1851(13) | 3.6438(6) | 10.6860(8)  | 106.733(13) | 267.92(7)           |
| 867(7)   | 7.1814(11) | 3.6244(6) | 10.6721(8)  | 106.737(13) | 266.01(7)           |
| 953(7)   | 7.1732(10) | 3.6110(4) | 10.6604(8)  | 106.737(12) | 264.44(6)           |
| 1022(7)  | 7.1678(9)  | 3.6011(5) | 10.6504(8)  | 106.763(12) | 263.23(6)           |
| 1093(8)  | 7.1619(11) | 3.5920(5) | 10.6411(8)  | 106.783(12) | 262.08(6)           |
| 1214(8)  | 7.1500(11) | 3.5759(5) | 10.625(9)   | 106.790(13) | 260.08(6)           |
| 1326(9)  | 7.1421(13) | 3.5625(5) | 10.6101(10) | 106.776(14) | 258.47(6)           |
| 1429(9)  | 7.1376(13) | 3.5515(5) | 10.5954(10) | 106.732(14) | 257.21(7)           |
| 1531(10) | 7.1352(15) | 3.5400(4) | 10.5799(11) | 106.702(16) | 255.96(7)           |
| 1628(10) | 7.1412(17) | 3.5295(5) | 10.5654(11) | 106.634(17) | 255.16(8)           |

**Table S10d. Unit cell parameters of form  $\gamma$  at 428 K as a function of pressure**

| $P$ /MPa | $a$ /Å     | $b$ /Å    | $c$ /Å      | $\beta$ /°  | $V$ /Å <sup>3</sup> |
|----------|------------|-----------|-------------|-------------|---------------------|
| 89(6)    | 7.1999(7)  | 3.7945(2) | 10.8208(5)  | 106.977(7)  | 282.75(4)           |
| 88(6)    | 7.2016(7)  | 3.7928(2) | 10.8187(5)  | 106.971(6)  | 282.64(4)           |
| 153(7)   | 7.1996(7)  | 3.7749(2) | 10.8029(5)  | 106.941(7)  | 280.86(4)           |
| 375(9)   | 7.1972(9)  | 3.7301(3) | 10.7632(7)  | 106.866(9)  | 276.52(5)           |
| 499(9)   | 7.1935(9)  | 3.7069(4) | 10.7404(8)  | 106.831(9)  | 274.13(5)           |
| 580(9)   | 7.1872(11) | 3.6927(4) | 10.7274(8)  | 106.828(12) | 272.51(6)           |
| 647(9)   | 7.1838(11) | 3.6808(5) | 10.7166(8)  | 106.845(11) | 271.20(6)           |
| 739(9)   | 7.1849(15) | 3.6611(7) | 10.7010(9)  | 106.859(14) | 269.39(8)           |
| 816(10)  | 7.1915(14) | 3.6416(6) | 10.6891(9)  | 106.852(14) | 267.91(7)           |
| 885(10)  | 7.1869(14) | 3.6305(8) | 10.6780(10) | 106.860(15) | 266.64(8)           |
| 1012(9)  | 7.1778(11) | 3.6086(6) | 10.6607(9)  | 106.858(12) | 264.26(7)           |
| 1121(9)  | 7.1695(12) | 3.5934(6) | 10.6454(10) | 106.874(14) | 262.45(7)           |
| 1231(10) | 7.1590(11) | 3.5796(5) | 10.6310(9)  | 106.874(13) | 260.71(6)           |
| 1335(10) | 7.1482(14) | 3.5667(5) | 10.6186(10) | 106.872(15) | 259.07(7)           |
| 1436(10) | 7.1396(12) | 3.5549(4) | 10.6041(10) | 106.856(15) | 257.58(6)           |
| 1556(11) | 7.1358(17) | 3.5434(5) | 10.5877(11) | 106.798(17) | 256.28(8)           |

**Table S11a. Unit cell parameters of form  $\delta$  at 295 K as a function of pressure**

| $P$ /MPa | $a$ /Å    | $b$ /Å    | $c$ /Å     | $\alpha$ /° | $\beta$ /° | $\gamma$ /° | $V$ /Å <sup>3</sup> |
|----------|-----------|-----------|------------|-------------|------------|-------------|---------------------|
| 13(3)    | 5.2132(5) | 5.7186(4) | 9.9296(14) | 97.175(12)  | 96.683(12) | 106.251(11) | 278.39(6)           |
| 18(3)    | 5.2124(5) | 5.7184(4) | 9.9277(13) | 97.164(12)  | 96.706(10) | 106.249(10) | 278.28(5)           |
| 16(3)    | 5.2119(5) | 5.7181(4) | 9.9276(13) | 97.153(13)  | 96.710(11) | 106.252(11) | 278.23(6)           |
| 17(3)    | 5.2112(5) | 5.7184(4) | 9.9283(12) | 97.177(11)  | 96.710(9)  | 106.250(10) | 278.21(5)           |
| 17(3)    | 5.2110(5) | 5.7184(4) | 9.9280(12) | 97.178(11)  | 96.713(9)  | 106.249(9)  | 278.19(5)           |
| 22(3)    | 5.2110(5) | 5.7182(4) | 9.9281(12) | 97.174(11)  | 96.715(9)  | 106.251(10) | 278.18(5)           |

|         |            |            |            |            |            |             |            |
|---------|------------|------------|------------|------------|------------|-------------|------------|
| 29(3)   | 5.2102(5)  | 5.7178(4)  | 9.9282(13) | 97.172(11) | 96.722(10) | 106.254(10) | 278.12(5)  |
| 16(3)   | 5.2117(6)  | 5.7172(4)  | 9.9235(15) | 97.158(13) | 96.728(12) | 106.251(11) | 278.05(6)  |
| 15(3)   | 5.2112(6)  | 5.7163(5)  | 9.9213(18) | 97.159(15) | 96.713(15) | 106.253(13) | 277.93(7)  |
| 16(3)   | 5.2114(7)  | 5.7152(5)  | 9.9188(18) | 97.167(17) | 96.714(15) | 106.249(15) | 277.81(8)  |
| 22(3)   | 5.2096(8)  | 5.7143(5)  | 9.917(2)   | 97.153(16) | 96.723(17) | 106.261(15) | 277.60(8)  |
| 29(3)   | 5.2090(8)  | 5.7134(6)  | 9.913(3)   | 97.146(18) | 96.73(2)   | 106.270(17) | 277.40(9)  |
| 32(3)   | 5.2077(9)  | 5.7119(6)  | 9.908(3)   | 97.150(19) | 96.74(2)   | 106.271(16) | 277.11(10) |
| 50(3)   | 5.2045(8)  | 5.7093(6)  | 9.898(3)   | 97.12(2)   | 96.83(2)   | 106.277(17) | 276.49(10) |
| 79(3)   | 5.1972(9)  | 5.7071(7)  | 9.876(4)   | 97.098(19) | 97.01(3)   | 106.323(18) | 275.16(12) |
| 117(2)  | 5.1860(9)  | 5.7028(7)  | 9.865(4)   | 97.07(2)   | 97.17(3)   | 106.390(19) | 273.84(13) |
| 164(2)  | 5.1776(9)  | 5.6960(7)  | 9.835(4)   | 97.09(2)   | 97.40(3)   | 106.306(19) | 272.15(12) |
| 218(2)  | 5.1668(9)  | 5.6899(7)  | 9.817(3)   | 97.063(18) | 97.57(2)   | 106.335(19) | 270.64(11) |
| 274(2)  | 5.1562(10) | 5.6838(7)  | 9.796(3)   | 97.04(2)   | 97.74(2)   | 106.362(19) | 269.06(11) |
| 327(3)  | 5.1473(10) | 5.6781(7)  | 9.781(3)   | 97.02(2)   | 97.896(18) | 106.377(19) | 267.73(11) |
| 382(3)  | 5.1383(10) | 5.6722(7)  | 9.762(3)   | 97.02(2)   | 98.036(16) | 106.39(2)   | 266.34(10) |
| 440(3)  | 5.1278(10) | 5.6675(7)  | 9.751(3)   | 97.03(2)   | 98.184(15) | 106.443(19) | 265.05(10) |
| 500(4)  | 5.1196(10) | 5.6622(7)  | 9.737(3)   | 97.02(2)   | 98.302(14) | 106.451(18) | 263.88(10) |
| 631(4)  | 5.1045(11) | 5.6499(8)  | 9.706(3)   | 97.01(3)   | 98.530(14) | 106.38(2)   | 261.59(11) |
| 785(5)  | 5.0887(12) | 5.6402(8)  | 9.675(3)   | 97.06(3)   | 98.762(15) | 106.38(3)   | 259.24(12) |
| 1079(5) | 5.0622(15) | 5.6213(9)  | 9.616(3)   | 97.10(3)   | 99.187(15) | 106.39(3)   | 255.02(13) |
| 1079(5) | 5.0624(15) | 5.6213(9)  | 9.616(3)   | 97.10(3)   | 99.184(14) | 106.39(3)   | 255.03(13) |
| 1216(4) | 5.0498(17) | 5.6127(10) | 9.593(4)   | 97.16(4)   | 99.371(15) | 106.37(3)   | 253.17(15) |
| 1369(4) | 5.0347(16) | 5.6034(10) | 9.576(3)   | 97.25(3)   | 99.540(15) | 106.30(3)   | 251.42(14) |
| 1511(6) | 5.022(2)   | 5.5952(11) | 9.559(4)   | 97.24(3)   | 99.721(15) | 106.29(3)   | 249.79(17) |
| 1647(4) | 5.006(3)   | 5.5878(11) | 9.545(4)   | 97.25(3)   | 99.875(16) | 106.28(3)   | 248.18(18) |

**Table S11b. Unit cell parameters of form  $\delta$  at 323 K as a function of pressure**

| $P$ /MPa | $a$ /Å     | $b$ /Å     | $c$ /Å   | $\alpha$ /° | $\beta$ /° | $\gamma$ /° | $V$ /Å <sup>3</sup> |
|----------|------------|------------|----------|-------------|------------|-------------|---------------------|
| 26(4)    | 5.2270(10) | 5.7105(9)  | 9.939(3) | 97.42(3)    | 96.430(18) | 106.10(3)   | 279.21(12)          |
| 28(4)    | 5.2287(10) | 5.7106(8)  | 9.934(4) | 97.46(3)    | 96.41(2)   | 106.08(3)   | 279.18(12)          |
| 37(4)    | 5.2280(9)  | 5.7110(9)  | 9.920(3) | 97.48(2)    | 96.494(19) | 106.11(3)   | 278.65(12)          |
| 54(4)    | 5.2271(10) | 5.7074(7)  | 9.924(2) | 97.474(19)  | 96.451(13) | 106.09(2)   | 278.62(9)           |
| 104(4)   | 5.2165(9)  | 5.7005(7)  | 9.900(3) | 97.38(2)    | 96.613(16) | 106.15(2)   | 276.90(10)          |
| 220(5)   | 5.1912(17) | 5.6886(15) | 9.845(2) | 97.41(3)    | 97.10(2)   | 106.15(5)   | 273.01(16)          |
| 323(4)   | 5.1745(14) | 5.6769(13) | 9.804(3) | 97.37(3)    | 97.406(17) | 106.12(5)   | 270.28(15)          |
| 407(5)   | 5.1624(17) | 5.6716(16) | 9.775(3) | 97.18(3)    | 97.670(17) | 106.25(6)   | 268.32(17)          |
| 471(5)   | 5.1525(18) | 5.6632(16) | 9.749(3) | 97.29(3)    | 97.811(15) | 106.14(5)   | 266.65(17)          |
| 530(5)   | 5.1448(19) | 5.6591(17) | 9.731(4) | 97.28(3)    | 97.942(16) | 106.17(5)   | 265.41(18)          |
| 576(5)   | 5.1380(16) | 5.6548(14) | 9.721(3) | 97.28(3)    | 98.042(14) | 106.18(5)   | 264.48(15)          |
| 664(5)   | 5.1284(19) | 5.6498(16) | 9.698(4) | 97.07(3)    | 98.270(17) | 106.35(6)   | 262.86(18)          |
| 743(5)   | 5.116(2)   | 5.642(2)   | 9.682(3) | 97.26(3)    | 98.378(19) | 106.23(7)   | 261.3(2)            |
| 899(5)   | 5.097(2)   | 5.6322(16) | 9.652(4) | 97.11(3)    | 98.688(18) | 106.35(6)   | 258.77(19)          |
| 1069(5)  | 5.0798(19) | 5.6212(16) | 9.620(4) | 97.14(3)    | 98.961(14) | 106.36(6)   | 256.23(18)          |
| 1465(5)  | 5.043(3)   | 5.5993(11) | 9.562(6) | 97.20(3)    | 99.462(13) | 106.38(3)   | 251.3(2)            |



|                    |            |            |          |          |            |           |            |
|--------------------|------------|------------|----------|----------|------------|-----------|------------|
| 1575(5)            | 5.028(3)   | 5.5940(15) | 9.555(5) | 97.19(3) | 99.606(12) | 106.39(6) | 249.9(2)   |
| 34(4) <sup>a</sup> | 5.2273(11) | 5.7097(7)  | 9.939(4) | 97.37(3) | 96.45(2)   | 106.18(2) | 279.09(13) |

<sup>a</sup> Obtained on releasing the pressure.

**Table S11c. Unit cell parameters of form  $\delta$  at 428 K as a function of pressure**

| $P$ /MPa            | $a$ /Å     | $b$ /Å     | $c$ /Å    | $\alpha$ /° | $\beta$ /° | $\gamma$ /° | $V$ /Å <sup>3</sup> |
|---------------------|------------|------------|-----------|-------------|------------|-------------|---------------------|
| 86(5)               | 5.2726(17) | 5.7135(12) | 9.968(6)  | 97.37(4)    | 95.64(5)   | 106.01(4)   | 283.4(2)            |
| 87(5)               | 5.2725(16) | 5.7139(11) | 9.976(6)  | 97.34(3)    | 95.63(5)   | 106.02(3)   | 283.7(2)            |
| 98(5)               | 5.273(3)   | 5.7129(12) | 9.982(7)  | 97.37(4)    | 95.58(7)   | 106.00(3)   | 283.9(3)            |
| 103(4)              | 5.2758(19) | 5.7127(12) | 9.982(6)  | 97.39(4)    | 95.52(6)   | 105.95(4)   | 284.1(2)            |
| 439(4)              | 5.1923(19) | 5.6757(13) | 9.817(7)  | 97.13(4)    | 97.03(6)   | 106.29(4)   | 271.8(3)            |
| 757(5)              | 5.154(2)   | 5.6452(17) | 9.704(8)  | 97.13(5)    | 97.82(5)   | 106.20(6)   | 264.7(3)            |
| 770(5)              | 5.157(3)   | 5.6451(18) | 9.693(9)  | 97.10(5)    | 97.87(6)   | 106.27(6)   | 264.4(3)            |
| 988(4)              | 5.125(3)   | 5.6281(18) | 9.640(6)  | 97.21(5)    | 98.37(3)   | 106.22(7)   | 260.1(3)            |
| 1196(4)             | 5.103(3)   | 5.6087(14) | 9.583(6)  | 97.20(6)    | 98.79(3)   | 106.12(6)   | 256.3(3)            |
| 744(5) <sup>a</sup> | 5.147(2)   | 5.6450(16) | 9.725(7)  | 97.10(5)    | 97.90(4)   | 106.29(6)   | 264.7(3)            |
| 626(5) <sup>a</sup> | 5.165(3)   | 5.6550(17) | 9.737(5)  | 97.13(5)    | 97.68(4)   | 106.28(6)   | 266.6(3)            |
| 507(4) <sup>a</sup> | 5.179(2)   | 5.6688(15) | 9.767(8)  | 97.21(5)    | 97.45(4)   | 106.29(5)   | 268.9(3)            |
| 353(4) <sup>a</sup> | 5.210(2)   | 5.6804(15) | 9.864(7)  | 97.25(4)    | 96.63(6)   | 106.17(5)   | 274.6(3)            |
| 345(4) <sup>a</sup> | 5.209(2)   | 5.6796(15) | 9.893(6)  | 97.21(4)    | 96.52(6)   | 106.15(5)   | 275.5(3)            |
| 199(4) <sup>a</sup> | 5.247(3)   | 5.6980(15) | 9.921(5)  | 97.42(4)    | 95.92(6)   | 106.09(5)   | 279.6(2)            |
| 155(4) <sup>a</sup> | 5.2586(15) | 5.7039(12) | 9.948(5)  | 97.41(4)    | 95.75(4)   | 106.05(4)   | 281.46(19)          |
| 109(4) <sup>a</sup> | 5.2665(14) | 5.7110(13) | 9.969(6)  | 97.41(4)    | 95.65(5)   | 106.03(4)   | 283.0(2)            |
| 86(5) <sup>a</sup>  | 5.2683(18) | 5.7138(11) | 9.968(5)  | 97.43(3)    | 95.64(5)   | 105.99(3)   | 283.18(19)          |
| 66(4) <sup>a</sup>  | 5.281(3)   | 5.7138(15) | 9.992(6)  | 97.40(4)    | 95.36(7)   | 105.98(5)   | 284.8(3)            |
| 60(4) <sup>a</sup>  | 5.288(2)   | 5.7133(12) | 9.995(6)  | 97.40(4)    | 95.23(5)   | 105.94(4)   | 285.4(2)            |
| 29(4) <sup>a</sup>  | 5.2922(2)  | 5.7145(10) | 9.989(5)  | 97.38(4)    | 95.23(4)   | 105.91(3)   | 285.57(18)          |
| 25(4) <sup>a</sup>  | 5.291(3)   | 5.7158(16) | 10.009(6) | 97.34(4)    | 95.21(6)   | 105.95(5)   | 286.1(3)            |
| 5(4) <sup>a</sup>   | 5.297(3)   | 5.7160(13) | 10.014(6) | 97.33(4)    | 95.12(6)   | 105.91(4)   | 286.8(3)            |
| 1(4) <sup>a</sup>   | 5.303(3)   | 5.7188(16) | 10.004(9) | 97.37(5)    | 95.17(7)   | 105.94(5)   | 286.8(4)            |

<sup>a</sup> Obtained on releasing the pressure.

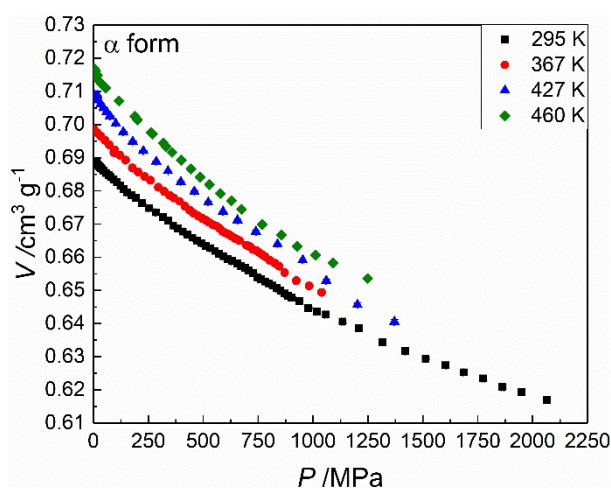

**Figure S2.** The specific volume of pyrazinamide form  $\alpha$  as a function of pressure at 295 K (black squares), 367 K (red circles), 427 K (blue triangles), and 460 K (green diamonds)

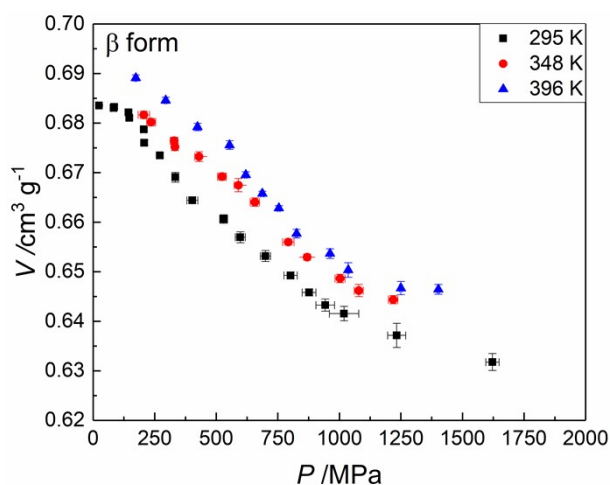

**Figure S3.** The specific volume of pyrazinamide form  $\beta$  as a function of pressure at 295 K (black squares), 348 K (red circles), and 396 K (blue triangles)

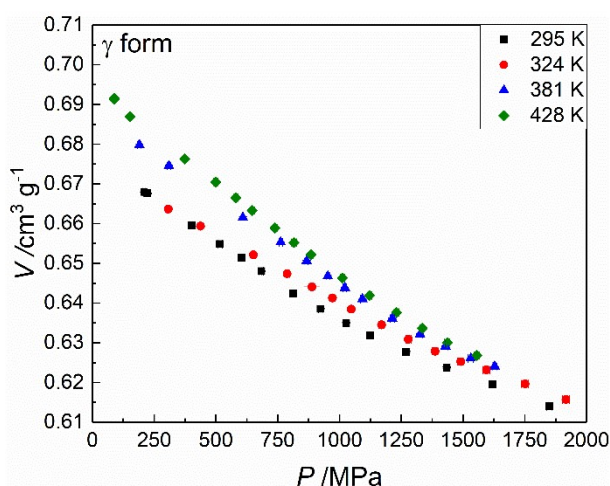

**Figure S4.** The specific volume of pyrazinamide form  $\gamma$  as a function of pressure at 295 K (black squares), 324 K (red circles), 381 K (blue triangles), and 428 K (green diamonds)

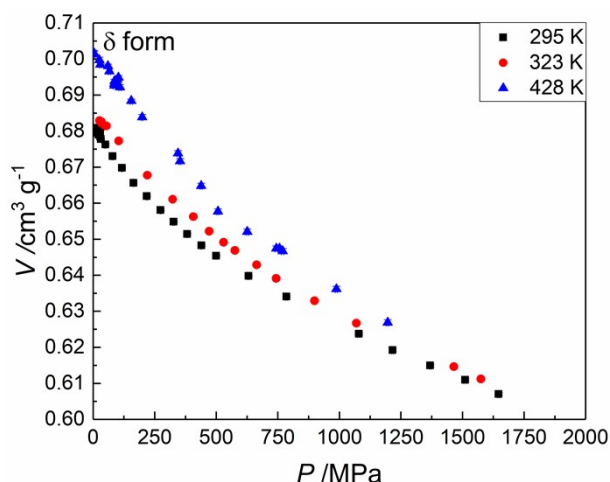

**Figure S5.** The specific volume of pyrazinamide form  $\delta$  as a function of pressure at 295 K (black squares), 323 K (red circles), and 428 K (blue triangles)

**Table S12. Principal coefficients of the isobaric thermal expansion tensor and the corresponding principal axes for form  $\alpha$**

| Principal axis,<br>$i$ | $\alpha_i$ (MK <sup>-1</sup> ) | Component of $x_i$ along the crystallographic axes |        |         |
|------------------------|--------------------------------|----------------------------------------------------|--------|---------|
|                        |                                | $a$                                                | $b$    | $c$     |
| 1                      | -23.1(6)                       | 0.0000                                             | 1.0000 | 0.0000  |
| 2                      | 31 (2)                         | 0.7588                                             | 0.0000 | -0.6514 |
| 3                      | 161(3)                         | -0.9993                                            | 0.0000 | -0.0368 |
| $V$                    | 170(4)                         |                                                    |        |         |

**Table S13. Principal coefficients of the isobaric thermal expansion tensor and the corresponding principal axes for form  $\beta$**

| Principal axis,<br>$i$ | $\alpha_i$ (MK <sup>-1</sup> ) | Component of $x_i$ along the crystallographic axes |         |         |
|------------------------|--------------------------------|----------------------------------------------------|---------|---------|
|                        |                                | $a$                                                | $b$     | $c$     |
| 1                      | -22.1(10)                      | -0.7464                                            | 0.0000  | -0.6655 |
| 2                      | 64(2)                          | -0.3690                                            | 0.0000  | 0.9294  |
| 3                      | 119(2)                         | 0.0000                                             | -1.0000 | 0.0000  |
| $V$                    | 161(3)                         |                                                    |         |         |

**Table S14. Principal coefficients of the isobaric thermal expansion tensor and the corresponding principal axes for form  $\gamma$**

| Principal axis,<br>$i$ | $\alpha_i$ (MK <sup>-1</sup> ) | Component of $x_i$ along the crystallographic axes |         |         |
|------------------------|--------------------------------|----------------------------------------------------|---------|---------|
|                        |                                | $a$                                                | $b$     | $c$     |
| 1                      | -1.86(7)                       | -0.09593                                           | 0.0000  | -0.2823 |
| 2                      | 44(2)                          | -0.2507                                            | 0.0000  | 0.9681  |
| 3                      | 137(3)                         | 0.0000                                             | -1.0000 | 0.0000  |
| $V$                    | 183(5)                         |                                                    |         |         |

**Table S15. Principal coefficients of the isobaric thermal expansion tensor and the corresponding principal axes for form  $\delta$**

| Principal axis,<br>$i$ | $\alpha_i$ (MK <sup>-1</sup> ) | Component of $x_i$ along the crystallographic axes |         |         |
|------------------------|--------------------------------|----------------------------------------------------|---------|---------|
|                        |                                | $a$                                                | $b$     | $c$     |
| 1                      | -6.1(9)                        | 0.5860                                             | 0.6391  | -0.4981 |
| 2                      | 17.1(7)                        | 0.3459                                             | -0.9099 | -0.2290 |
| 3                      | 178(6)                         | 0.8848                                             | 0.3337  | 0.3252  |
| $V$                    | 192(7)                         |                                                    |         |         |

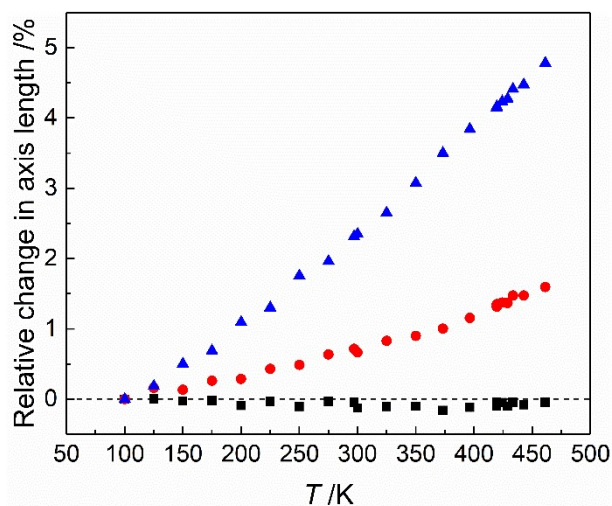

**Figure S6.** Thermal expansion tensor: relative change in the principal axes ( $x_1$ : ■,  $x_2$ : ●, and  $x_3$ : ▲) of form  $\alpha$  as a function of temperature

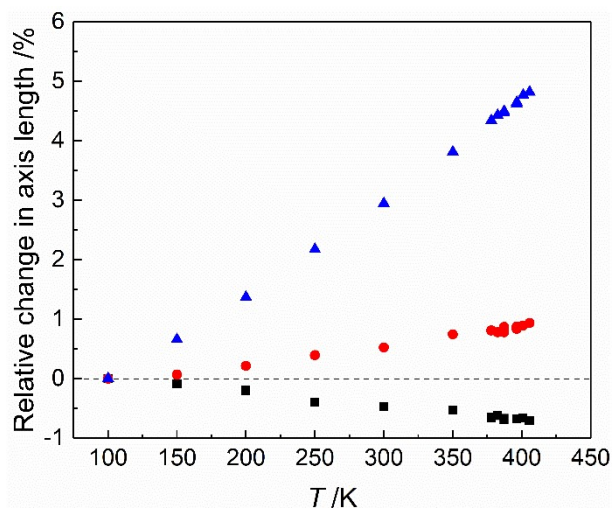

**Figure S7.** Thermal expansion tensor: relative change in the principal axes ( $x_1$ : ■,  $x_2$ : ●, and  $x_3$ : ▲) of form  $\beta$  as a function of temperature

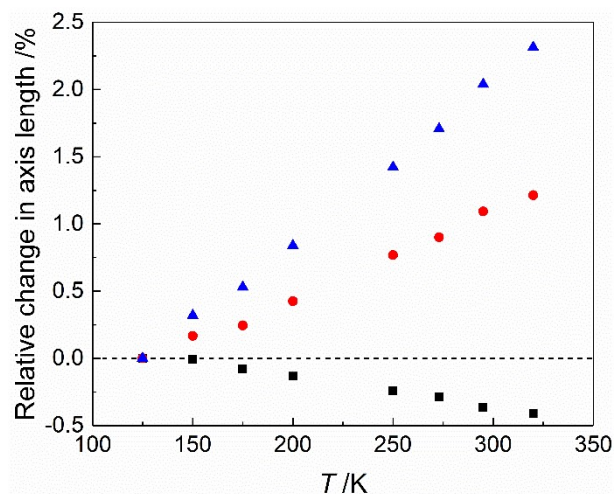

**Figure S8.** Thermal expansion tensor: relative change in the principal axes ( $x_1$ : ■,  $x_2$ : ●, and  $x_3$ : ▲) of form  $\gamma$  as a function of temperature

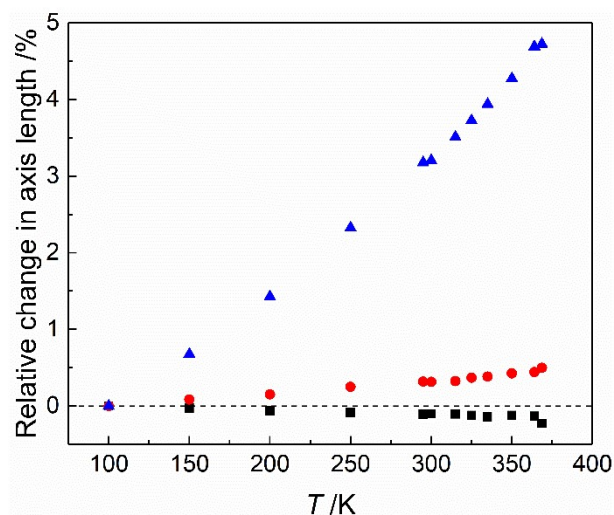

**Figure S9.** Thermal expansion tensor: relative change in the principal axes ( $x_1$ : ■,  $x_2$ : ●, and  $x_3$ : ▲) of form  $\delta$  as a function of temperature

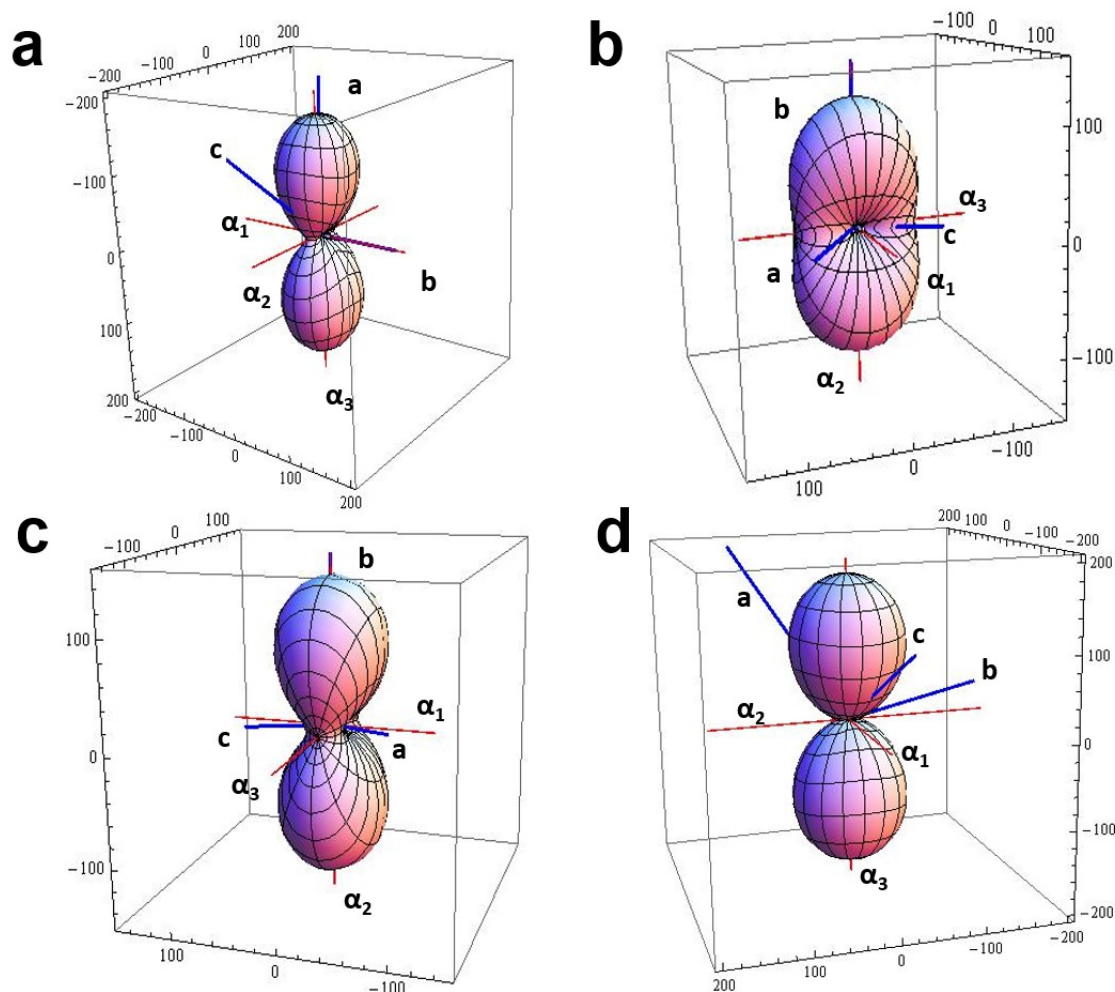

**Figure S10.** Graphic representations of the isobaric thermal expansion tensors of forms  $\alpha$  (a),  $\beta$  (b),  $\gamma$  (c), and  $\delta$  (d). The numbers on the axes represent the value of the respective tensor component  $\alpha_1$ ,  $\alpha_2$ , and  $\alpha_3$  as indicated by the respective red lines (see also Tables S12-S15). The negative tensor parts are relatively small in comparison with the positive parts and therefore very hard to distinguish.

**Table S16. Principal coefficients of the isothermal compression tensor and the corresponding principal axes for form  $\alpha$**

| Principal axis,<br>$i$ | $K_I$ (TPa <sup>-1</sup> ) | Component of $x_i$ along the crystallographic axes |        |         |
|------------------------|----------------------------|----------------------------------------------------|--------|---------|
|                        |                            | $a$                                                | $b$    | $c$     |
| 1                      | 40.9(8)                    | -0.9994                                            | 0.0000 | -0.0333 |
| 2                      | 13.2(2)                    | 0.7227                                             | 0.0000 | -0.6911 |
| 3                      | 2.7(2)                     | 0.0000                                             | 1.0000 | 0.0000  |
| $V$                    | 55(2)                      |                                                    |        |         |

**Table S17. Principal coefficients of the isothermal compression tensor and the corresponding principal axes for form  $\beta$**

| Principal axis, | $K_I$ (TPa <sup>-1</sup> ) | Component of $x_i$ along the crystallographic axes |
|-----------------|----------------------------|----------------------------------------------------|
|-----------------|----------------------------|----------------------------------------------------|

| <i>i</i> |        | <i>a</i> | <i>b</i> | <i>c</i> |
|----------|--------|----------|----------|----------|
| 1        | 29(5)  | 0.0000   | -1.0000  | 0.0000   |
| 2        | 8(5)   | -0.4514  | 0.0000   | 0.8923   |
| 3        | 0.0(7) | -0.6936  | 0.0000   | -0.7204  |
| <i>V</i> | 60(5)  |          |          |          |

**Table S18. Principal coefficients of the isothermal compression tensor and the corresponding principal axes for form  $\gamma$**

| Principal axis,<br><i>i</i> | $K_I$ (TPa <sup>-1</sup> ) | Component of $x_i$ along the crystallographic axes |          |          |
|-----------------------------|----------------------------|----------------------------------------------------|----------|----------|
|                             |                            | <i>a</i>                                           | <i>b</i> | <i>c</i> |
| 1                           | 34.6(7)                    | 0.0000                                             | -1.0000  | 0.0000   |
| 2                           | 11.3(2)                    | 0.3839                                             | 0.0000   | 0.9234   |
| 3                           | 3(2)                       | -1.0000                                            | 0.0000   | -0.0058  |
| <i>V</i>                    | 51(3)                      |                                                    |          |          |

**Table S19. Principal coefficients of the isothermal compression tensor and the corresponding principal axes for form  $\delta$**

| Principal axis,<br><i>i</i> | $K_I$ (TPa <sup>-1</sup> ) | Component of $x_i$ along the crystallographic axes |          |          |
|-----------------------------|----------------------------|----------------------------------------------------|----------|----------|
|                             |                            | <i>a</i>                                           | <i>b</i> | <i>c</i> |
| 1                           | 82.0(8)                    | -0.8460                                            | -0.2871  | -0.4493  |
| 2                           | 15(2)                      | -0.5175                                            | -0.8242  | 0.2301   |
| 3                           | 13.4(4)                    | 0.6627                                             | -0.6701  | -0.3343  |
| <i>V</i>                    | 73(4)                      |                                                    |          |          |

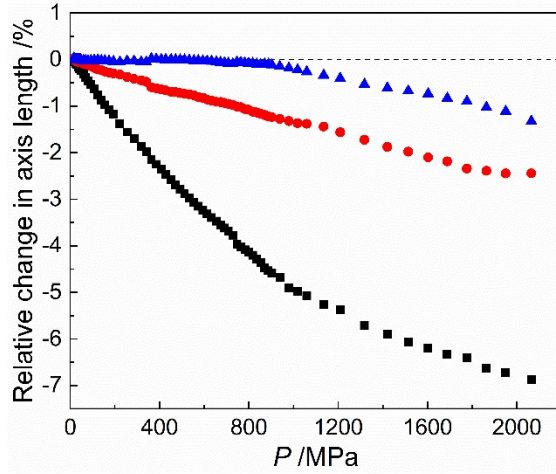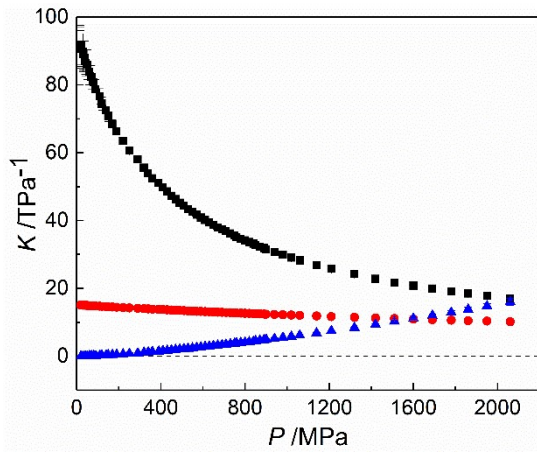

**Figure S11.** Compression tensor form  $\alpha$  left-hand side: relative change in the principal axes ( $x_1$ : ■,  $x_2$ : ●, and  $x_3$ : ▲) and, right-hand side, the principal compressibility ( $K_1$ : ■,  $K_2$ : ●, and  $K_3$ : ▲) as a function of pressure

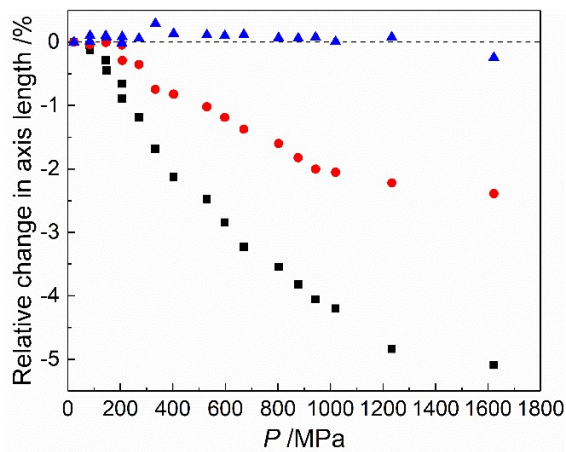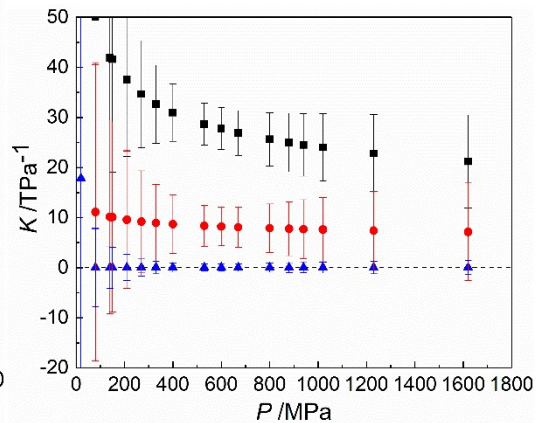

**Figure S12.** Compression tensor form  $\beta$  left-hand side: relative change in the principal axes ( $x_1$ : ■,  $x_2$ : ●, and  $x_3$ : ▲) and, right-hand side, the principal compressibility ( $K_1$ : ■,  $K_2$ : ●, and  $K_3$ : ▲) as a function of pressure



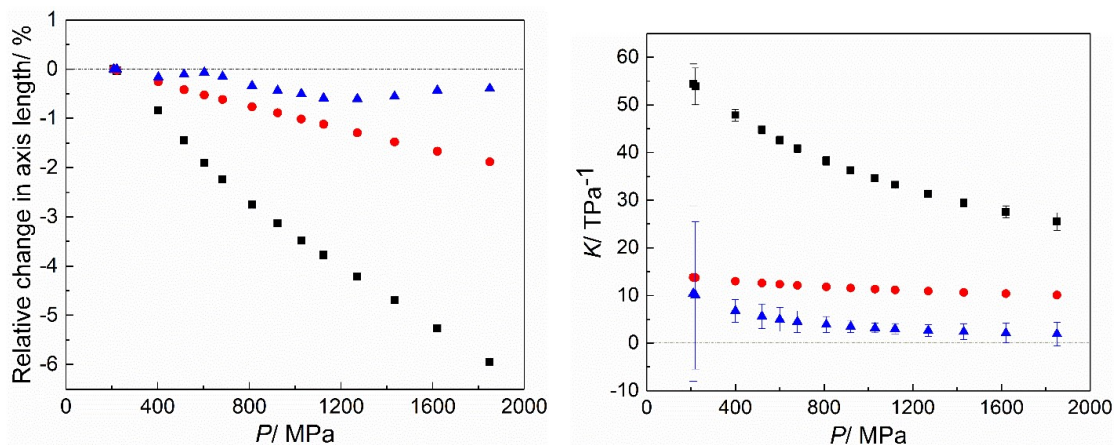

**Figure S13.** Compression tensor form  $\gamma$  left-hand side: relative change in the principal axes ( $x_1$ : ■,  $x_2$ : ●, and  $x_3$ : ▲) and, right-hand side, the principal compressibility ( $K_1$ : ■,  $K_2$ : ●, and  $K_3$ : ▲) as a function of pressure

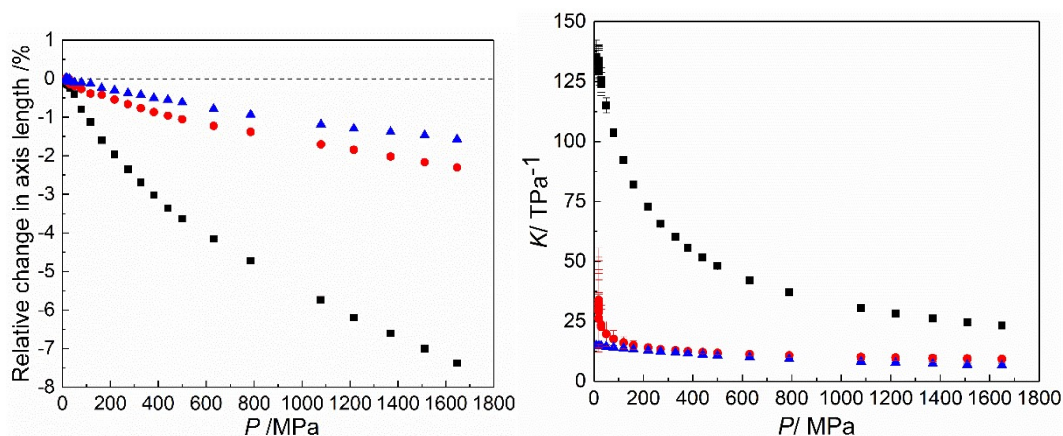

**Figure S14.** Compression tensor form  $\delta$  left-hand side: relative change in the principal axes ( $x_1$ : ■,  $x_2$ : ●, and  $x_3$ : ▲) and, right-hand side, the principal compressibility ( $K_1$ : ■,  $K_2$ : ●, and  $K_3$ : ▲) as a function of pressure

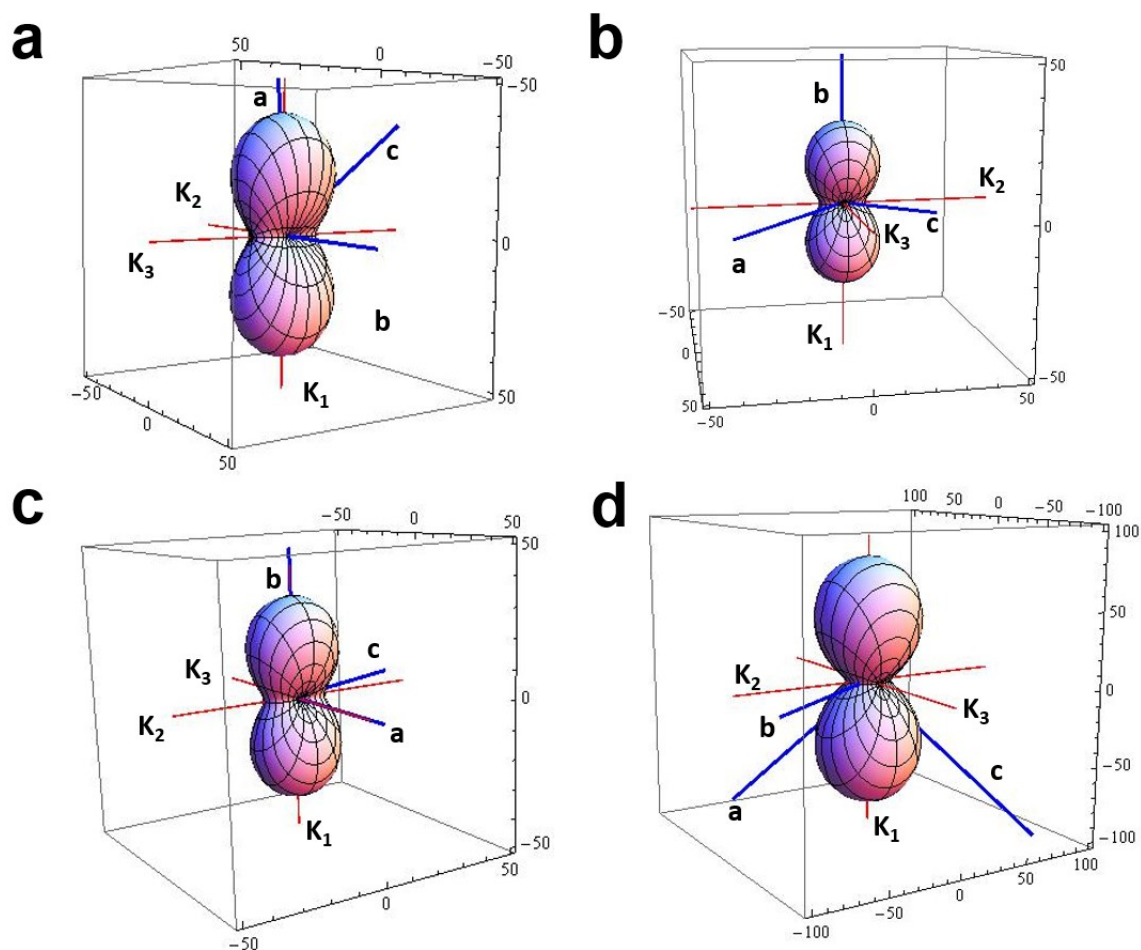

**Figure S15.** Graphic representations of the isothermal compression tensors of forms  $\alpha$  (a),  $\beta$  (b),  $\gamma$  (c), and  $\delta$  (d). The numbers on the axes represent the value of the respective tensor component  $K_1$ ,  $K_2$ , and  $K_3$  as indicated by the respective red lines (see also Tables S16-S19).

(Coupled TwoTheta/Theta)

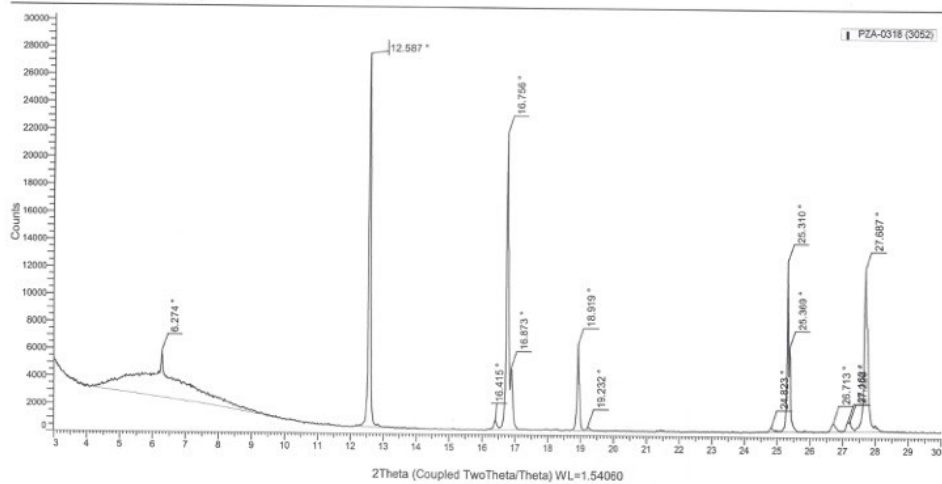

**Figure S16.** X-ray diffraction pattern of pyrazinamide crystallized at 252 K from acetonitrile. The pattern is fully equivalent to that of form  $\beta$ . Only the peak at  $16.415^\circ$   $2\theta$  may be ascribed to form  $\delta$ .

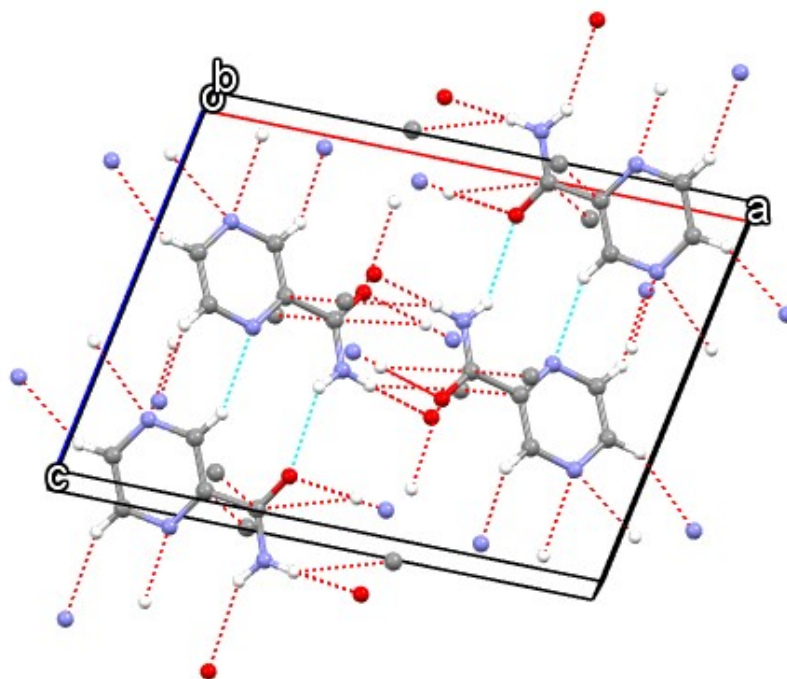

**Figure S17.** Global hydrogen bond network in form  $\beta$ .
